# Supplementary material for: Shared heritability and functional enrichment across six solid cancers
Source: PubMed Central journal article supplement (PMC6347624; doi:10.1038/s41467-018-08054-4), 2019-01-25
Supplement: 41467_2018_8054_MOESM1_ESM.pdf [file 41467_2018_8054_MOESM1_ESM.pdf]

# Shared heritability and functional enrichment across six solid cancers

Jiang et al.

**Supplementary Table1. Estimates of SNP-heritability and cross-cancer heritability based on HapMap3 SNPs using LD score regression for each cancer and its subsets.**

| cancer type          | sample size |          | All HapMap3 SNPs        |                          | Remove GWAS significant hits +/- 500 kb |                          | Proportion explained by known GWAS hits |           | population prevalence (cumulative risk) | Breast cancer | ER-positive                                              | ER-negative                                         | Colorectal cancer                                | Head and neck cancer                              | Lung cancer                                       | Adenocarcinoma                                          | Ever smoking                                        | Squamous cell                                    | Ovarian cancer                                    | Serous invasive                                         | Prostate cancer                                         | Advanced stage             |                            |
|----------------------|-------------|----------|-------------------------|--------------------------|-----------------------------------------|--------------------------|-----------------------------------------|-----------|-----------------------------------------|---------------|----------------------------------------------------------|-----------------------------------------------------|--------------------------------------------------|---------------------------------------------------|---------------------------------------------------|---------------------------------------------------------|-----------------------------------------------------|--------------------------------------------------|---------------------------------------------------|---------------------------------------------------------|---------------------------------------------------------|----------------------------|----------------------------|
|                      | cases       | controls | h <sup>2</sup> observed | h <sup>2</sup> liability | h <sup>2</sup> observed                 | h <sup>2</sup> liability | observed                                | liability |                                         |               |                                                          |                                                     |                                                  |                                                   |                                                   |                                                         |                                                     |                                                  |                                                   |                                                         |                                                         |                            |                            |
| Breast cancer        | 122977      | 105974   | 0.13<br>(0.011)         | 0.14<br>(0.012)          | 0.074<br>(0.0041)                       | 0.077<br>(0.0043)        | 0.43                                    | 0.45      | 9.4%                                    | 1             | <b>0.98</b><br>( <b>0.0043</b> ),<br><b>&lt;1.0E-200</b> | <b>0.74</b><br>( <b>0.025</b> ),<br><b>1.6E-198</b> | <b>0.15</b><br>( <b>0.04</b> ),<br><b>1.1E-4</b> | 0.029<br>(0.059),<br>0.62                         | <b>0.18</b><br>( <b>0.037</b> ),<br><b>1.5E-6</b> | <b>0.20 (0.041)</b> ,<br><b>1.0E-6</b>                  | 0.18<br>(0.054),<br>6.6E-04                         | 0.15<br>(0.05),<br>0.0027                        | <b>0.24</b><br>( <b>0.060</b> ),<br><b>7.1E-5</b> | 0.16<br>(0.061),<br>0.0094                              | 0.072<br>(0.029),<br>0.012                              | 0.074<br>(0.04),<br>0.063  |                            |
| ER-positive          | 69501       | 95042    | 0.14<br>(0.014)         | -                        | 0.080<br>(0.0052)                       | -                        | 0.43                                    | -         | -                                       | 1             | <b>0.60</b><br>( <b>0.032</b> ),<br><b>1.0E-79</b>       | <b>0.16</b><br>( <b>0.043</b> ),<br><b>1.3E-4</b>   | -0.016<br>(0.066),<br>0.81                       | <b>0.13</b><br>( <b>0.036</b> ),<br><b>5.9E-4</b> | <b>0.15 (0.043)</b> ,<br><b>4.1E-4</b>            | 0.13<br>(0.052),<br>0.011                               | 0.11<br>(0.052),<br>0.032                           | 0.19<br>(0.061),<br>0.0020                       | 0.11<br>(0.062),<br>0.09                          | 0.07<br>(0.03),<br>0.02                                 | 0.075<br>(0.043),<br>0.08                               |                            |                            |
| ER-negative          | 21468       | 100564   | 0.075<br>(0.0065)       | -                        | 0.057<br>(0.0048)                       | -                        | 0.24                                    | -         | -                                       | 1             | <b>0.12</b><br>(0.059),<br>0.045                         | <b>0.29</b><br>( <b>0.057</b> ),<br><b>1.2E-6</b>   | 0.21<br>(0.086),<br>0.016                        | <b>0.29</b><br>( <b>0.059</b> ),<br><b>6.6E-7</b> | <b>0.23 (0.063)</b> ,<br><b>0.00024</b>           | <b>0.30</b><br>( <b>0.074</b> ),<br><b>5.7E-5</b>       | <b>0.33</b><br>( <b>0.075</b> ),<br><b>9.9E-6</b>   | 0.24<br>(0.089),<br>0.0064                       | 0.17<br>(0.08),<br>0.02                           | 0.051<br>(0.041),<br>0.22                               | 0.016<br>(0.058),<br>0.78                               |                            |                            |
| Colorectal cancer    | 36948       | 30864    | 0.11<br>(0.011)         | 0.090<br>(0.0089)        | 0.085<br>(0.0088)                       | 0.072<br>(0.0074)        | 0.23                                    | 0.20      | 4.8%                                    |               |                                                          |                                                     | 1                                                | -0.067<br>(0.094),<br>0.47                        | <b>0.28</b><br>( <b>0.057</b> ),<br><b>6.6E-7</b> | <b>0.28 (0.075)</b> ,<br><b>0.00026</b>                 | <b>0.25</b><br>( <b>0.070</b> ),<br><b>0.00025</b>  | 0.26<br>(0.082),<br>0.0014                       | 0.5<br>(0.090),<br>0.59                           | -0.061<br>(0.082),<br>0.023                             | -0.044<br>(0.049),<br>0.11                              | 0.12<br>(0.075),<br>0.11   |                            |
| head and neck cancer | 5452        | 5984     | 0.19<br>(0.043)         | 0.097<br>(0.023)         | 0.18<br>(0.043)                         | 0.097<br>(0.023)         | 0.05                                    | 0.00      | 0.8%                                    |               |                                                          |                                                     |                                                  | 1                                                 | <b>0.57</b><br>( <b>0.10</b> ),<br><b>4.6E-8</b>  | <b>0.49 (0.12)</b> ,<br><b>0.000079</b>                 | <b>0.60</b><br>( <b>0.13</b> ),<br><b>3.8E-6</b>    | <b>0.63</b><br>( <b>0.13</b> ),<br><b>1.7E-6</b> | 0.095<br>(0.15),<br>0.52                          | 0.23<br>(0.13),<br>0.07                                 | 0.15<br>(0.079),<br>0.05                                | 0.28<br>(0.11),<br>0.011   |                            |
| Lung cancer          | 29266       | 56450    | 0.090<br>(0.013)        | 0.075<br>(0.011)         | 0.068<br>(0.007)                        | 0.056<br>(0.0058)        | 0.24                                    | 0.25      | 3.2%                                    |               |                                                          |                                                     |                                                  | 1                                                 | <b>0.84 (0.036)</b> ,<br><b>1.18E-117</b>         | <b>1.00</b><br>( <b>0.023</b> ),<br><b>&lt;1.0E-200</b> | <b>0.93</b><br>( <b>0.041</b> ),<br><b>1.1E-112</b> | 0.16<br>(0.077),<br>0.03                         | 0.18<br>(0.077),<br>0.02                          | -0.026<br>(0.043),<br>0.54                              | 0.036<br>(0.063),<br>0.57                               |                            |                            |
| Adenocarcinoma       | 11273       | 55483    | 0.067<br>(0.0094)       | -                        | 0.055<br>(0.0077)                       | -                        | 0.18                                    | -         | -                                       |               |                                                          |                                                     |                                                  |                                                   | 1                                                 | <b>0.89</b><br>( <b>0.049</b> ),<br><b>5.1E-75</b>      | <b>0.58</b><br>( <b>0.10</b> ),<br><b>1.7E-8</b>    | 0.083<br>(0.096),<br>0.39                        | 0.077<br>(0.09),<br>0.39                          | 0.058<br>(0.050),<br>0.24                               | 0.085<br>(0.074),<br>0.26                               |                            |                            |
| Ever smoking         | 23223       | 16964    | 0.11<br>(0.024)         | -                        | 0.086<br>(0.016)                        | -                        | 0.22                                    | -         | -                                       |               |                                                          |                                                     |                                                  |                                                   | 1                                                 | <b>0.93</b><br>( <b>0.052</b> ),<br><b>1.6E-71</b>      | <b>0.93</b><br>( <b>0.052</b> ),<br><b>1.6E-71</b>  | 0.17<br>(0.11),<br>0.12                          | 0.17<br>(0.10),<br>0.078                          | -0.039<br>(0.054),<br>0.47                              | 0.0009<br>(0.086),<br>0.99                              |                            |                            |
| Squamous carcinoma   | 7426        | 55627    | 0.062<br>(0.013)        | -                        | 0.045<br>(0.009)                        | -                        | 0.27                                    | -         | -                                       |               |                                                          |                                                     |                                                  |                                                   | 1                                                 | <b>0.93</b><br>( <b>0.052</b> ),<br><b>1.6E-71</b>      | <b>0.93</b><br>( <b>0.052</b> ),<br><b>1.6E-71</b>  | 0.10<br>(0.10),<br>0.32                          | 0.19<br>(0.09),<br>0.040                          | -0.058<br>(0.049),<br>0.24                              | 0.020<br>(0.078),<br>0.80                               |                            |                            |
| Ovarian cancer       | 22406       | 40941    | 0.048<br>(0.0096)       | 0.033<br>(0.0065)        | 0.037<br>(0.0076)                       | 0.025<br>(0.0051)        | 0.23                                    | 0.24      | 1.6%                                    |               |                                                          |                                                     |                                                  |                                                   |                                                   |                                                         |                                                     |                                                  | 1                                                 | <b>0.97</b><br>( <b>0.02</b> ),<br><b>&lt;1.0E-200</b>  | 0.024<br>(0.07),<br>0.73                                | 0.055<br>(0.092),<br>0.55  |                            |
| Serous invasive      | 14055       | 40941    | 0.065<br>(0.012)        | -                        | 0.044<br>(0.009)                        | -                        | 0.32                                    | -         | -                                       |               |                                                          |                                                     |                                                  |                                                   |                                                   |                                                         |                                                     |                                                  | 1                                                 | <b>0.92</b><br>( <b>0.021</b> ),<br><b>&lt;1.0E-200</b> | 0.033<br>(0.06),<br>0.57                                | -0.0059<br>(0.08),<br>0.94 |                            |
| Prostate cancer      | 79166       | 61106    | 0.17<br>(0.020)         | 0.18<br>(0.021)          | 0.077<br>(0.0054)                       | 0.083<br>(0.0058)        | 0.55                                    | 0.54      | 10.5%                                   |               |                                                          |                                                     |                                                  |                                                   |                                                   |                                                         |                                                     |                                                  |                                                   | 1                                                       | <b>0.92</b><br>( <b>0.021</b> ),<br><b>&lt;1.0E-200</b> | 0.033<br>(0.06),<br>0.57   | -0.0059<br>(0.08),<br>0.94 |
| Advanced stage       | 15167       | 58308    | 0.10<br>(0.012)         | -                        | 0.069<br>(0.0085)                       | -                        | 0.31                                    | -         | -                                       |               |                                                          |                                                     |                                                  |                                                   |                                                   |                                                         |                                                     |                                                  |                                                   |                                                         |                                                         | 1                          |                            |

Estimates of SNP-heritability on observed scale and liability scales, were calculated based on all HapMap3 SNPs, as well as SNPs after excluding GWAS significant hits ( $P < 5 \times 10^{-8}$ ) and its 500k base-pairs surrounded areas. Cumulative risks were cited from Lorelei Mucci et al. JAMA 2016 (315) paper, together with the sample prevalence (proportion of cases in the total samples), were used to convert SNP-heritability from observed scale to liability scale. The genetic correlations among cancer pairs, in the brackets were standard errors, followed by p-values. Bold font: results withstood multiple corrections (Bonferroni correction,  $P < 0.05/78 = 0.00064$ ).

**Supplementary Table 2. Estimates of SNP-heritability on the liability scale based on HapMap3 SNPs using LD score regression for each cancer, remove GWAS significant hits.**

| cancer type       | All SNPs          | Remove GWAS significant hits +/- 500 kb of the same cancer |           | Heritability after removing GWAS significant hits +/- 500 kb of different cancers |           |                   |           |                   |           |                   |           |                  |           |                   |             |
|-------------------|-------------------|------------------------------------------------------------|-----------|-----------------------------------------------------------------------------------|-----------|-------------------|-----------|-------------------|-----------|-------------------|-----------|------------------|-----------|-------------------|-------------|
|                   |                   | h <sup>2</sup>                                             | Prop. exp | Breast cancer                                                                     | Prop. exp | Colorectal cancer | Prop. exp | Head/neck cancer  | Prop. exp | Lung cancer       | Prop. exp | Ovarian cancer   | Prop. exp | Prostate cancer   | Prop. exp   |
| <b>Breast</b>     | 0.14<br>(0.012)   | 0.077<br>(0.0043)                                          | 0.45      | NA                                                                                | NA        | 0.138<br>(0.011)  | 0.01      | 0.14<br>(0.012)   | 0.00      | 0.14<br>(0.011)   | 0.00      | 0.138<br>(0.012) | 0.01      | 0.125<br>(0.009)  | <b>0.11</b> |
| <b>Colorectal</b> | 0.090<br>(0.0089) | 0.072<br>(0.0074)                                          | 0.20      | 0.081<br>(0.0089)                                                                 | 0.10      | NA                | NA        | 0.089<br>(0.0088) | 0.01      | 0.089<br>(0.0094) | 0.01      | 0.089<br>(0.009) | 0.01      | 0.087<br>(0.0094) | 0.03        |
| <b>Head/neck</b>  | 0.097<br>(0.023)  | 0.097<br>(0.023)                                           | 0.00      | 0.094<br>(0.022)                                                                  | 0.03      | 0.095<br>(0.022)  | 0.02      | NA                | NA        | 0.087<br>(0.021)  | 0.10      | 0.096<br>(0.022) | 0.01      | 0.094<br>(0.023)  | 0.03        |
| <b>Lung</b>       | 0.075<br>(0.011)  | 0.056<br>(0.0058)                                          | 0.25      | 0.068<br>(0.011)                                                                  | 0.09      | 0.074<br>(0.012)  | 0.01      | 0.074<br>(0.011)  | 0.01      | NA                | NA        | 0.074<br>(0.011) | 0.01      | 0.070<br>(0.011)  | 0.07        |
| <b>Ovarian</b>    | 0.033<br>(0.0065) | 0.025<br>(0.0051)                                          | 0.24      | 0.028<br>(0.0064)                                                                 | 0.15      | 0.033<br>(0.0062) | 0.00      | 0.032<br>(0.0065) | 0.03      | 0.033<br>(0.0065) | 0.00      | NA               | NA        | 0.028<br>(0.0061) | 0.15        |
| <b>Prostate</b>   | 0.18<br>(0.021)   | 0.083<br>(0.0058)                                          | 0.54      | 0.14<br>(0.013)                                                                   | 0.22      | 0.16<br>(0.013)   | 0.11      | 0.18<br>(0.022)   | 0.00      | 0.18<br>(0.012)   | 0.00      | 0.18<br>(0.021)  | 0.00      | NA                | NA          |

**Supplementary Table 3. Enrichment estimates for the 24 non-cell-type specific annotations, meta-analyzed across the six cancer types.**

| Category           | %SNP   | 24 main annotations |                 | Breast Cancer      |          | Colorectal Cancer  |          | Head and Neck Cancer  |          | Lung Cancer         |          | Ovarian Cancer      |          | Prostate Cancer    |          |
|--------------------|--------|---------------------|-----------------|--------------------|----------|--------------------|----------|-----------------------|----------|---------------------|----------|---------------------|----------|--------------------|----------|
|                    |        | Enrichment (95%CI)  | P-value         | Enrichment (95%CI) | P-value  | Enrichment (95%CI) | P-value  | Enrichment (95%CI)    | P-value  | Enrichment (95%CI)  | P-value  | Enrichment (95%CI)  | P-value  | Enrichment (95%CI) | P-value  |
| Conserved region   | 2.57%  | 9.78(5.72-13.84)    | <b>2.27E-05</b> | 6.09(0.66-11.52)   | 6.92E-02 | 5.44(-2.32-13.2)   | 2.52E-01 | 9.8(-21.14-40.74)     | 5.56E-01 | 13.04(4.84-21.24)   | 5.49E-03 | 24.49(-2.64-51.61)  | 8.32E-02 | 14.25(7.66-20.85)  | 6.46E-05 |
| TSS                | 1.78%  | 5.42(2.47-8.37)     | 3.35E-03        | 5.83(1.29-10.37)   | 4.22E-02 | 6.4(-0.81-13.61)   | 1.25E-01 | -12.81(-43.26-17.64)  | 3.04E-01 | 3.31(-5.36-11.97)   | 6.02E-01 | 0.3(-16.78-17.38)   | 9.35E-01 | 6.31(0.47-12.16)   | 7.19E-02 |
| 3'UTR              | 1.12%  | 4.94(1.11-8.77)     | 4.39E-02        | 1.55(-3.14-6.24)   | 8.18E-01 | 6.28(-2.56-15.12)  | 2.40E-01 | -9.77(-37.25-17.72)   | 4.32E-01 | 3.55(-3.08-10.17)   | 4.57E-01 | 16.34(0.32-32.36)   | 2.78E-02 | 9.06(2.45-15.68)   | 1.40E-02 |
| Coding region      | 1.43%  | 4.93(1.82-8.04)     | 1.32E-02        | 2.37(-2.29-7.04)   | 5.62E-01 | 4.87(-4.33-14.07)  | 4.07E-01 | 0.49(-29.63-30.61)    | 9.73E-01 | 4.94(-3.53-13.42)   | 3.68E-01 | 2.5(-13-18.01)      | 8.49E-01 | 9.99(3.83-16.15)   | 2.89E-03 |
| TFBS               | 13.12% | 4.04(2.91-5.17)     | <b>1.43E-07</b> | 5.15(3.23-7.08)    | 7.11E-05 | 5.31(1.86-8.75)    | 1.84E-02 | -1.71(-14.11-10.7)    | 6.63E-01 | 4.09(1.16-7.01)     | 4.09E-02 | 4.34(-1.34-10.02)   | 2.53E-01 | 2.62(0.7-4.54)     | 9.52E-02 |
| H3K9ac             | 12.54% | 3.41(2.14-4.69)     | <b>2.04E-04</b> | 3.91(1.7-6.12)     | 9.95E-03 | 5.66(3.51-7.81)    | 2.22E-05 | -1.69(-9.13-5.74)     | 4.36E-01 | 2.13(0.05-4.21)     | 2.93E-01 | 2.7(-1.79-7.19)     | 4.63E-01 | 3.1(1.6-4.59)      | 7.65E-03 |
| 5'UTR              | 0.55%  | 3.31(-1.01-7.63)    | 2.95E-01        | 3.47(-2.76-9.71)   | 4.36E-01 | -0.22(-11.64-11.2) | 8.33E-01 | 4.86(-33.36-43.07)    | 8.42E-01 | -1.25(-14.81-12.31) | 7.43E-01 | -5.64(-29.02-17.74) | 5.64E-01 | 8.46(-0.59-17.51)  | 1.04E-01 |
| H3K4me3            | 13.30% | 3.24(2.47-4)        | <b>8.91E-09</b> | 4.18(2.53-5.82)    | 3.71E-04 | 3.67(2.17-5.17)    | 3.65E-04 | -1.45(-8.07-5.17)     | 4.45E-01 | 2.17(0.34-3.99)     | 2.08E-01 | 3.33(-0.08-6.75)    | 1.85E-01 | 2.99(1.58-4.41)    | 5.84E-03 |
| Enhancer           | 4.20%  | 3.22(1.41-5.04)     | 1.62E-02        | 3.41(0.33-6.48)    | 1.23E-01 | 2.07(-2.47-6.61)   | 6.44E-01 | -7.13(-24.59-10.33)   | 3.18E-01 | 3.43(-1.74-8.6)     | 3.64E-01 | 2.53(-5.38-10.45)   | 7.03E-01 | 4.02(0.74-7.3)     | 5.99E-02 |
| Weak Enhancer      | 2.10%  | 3.1(-0.23-6.43)     | 2.17E-01        | 3.56(-1.9-9.01)    | 3.58E-01 | 7.16(-0.7-15.01)   | 1.21E-01 | -7.38(-34.66-19.89)   | 5.39E-01 | -1.83(-9.37-5.72)   | 4.58E-01 | 10.32(-7.24-27.88)  | 2.94E-01 | 2.88(-4.53-10.28)  | 6.17E-01 |
| FANTOM5 Enhancer   | 0.43%  | 3.05(-6.17-12.27)   | 6.63E-01        | 3.22(-12.38-18.83) | 7.80E-01 | 3.19(-18.32-24.7)  | 8.40E-01 | -41.18(-122.43-40.06) | 2.53E-01 | -2.81(-22.59-16.96) | 7.05E-01 | -7.75(-50.5-34.99)  | 6.88E-01 | 14.91(-6.21-36.03) | 1.86E-01 |
| DHS                | 16.62% | 2.83(1.57-4.08)     | 4.51E-03        | 3.31(1.51-5.1)     | 1.62E-02 | 4.62(2.13-7.11)    | 5.46E-03 | -4.06(-14.2-6.08)     | 3.08E-01 | 0.55(-2.1-3.2)      | 7.35E-01 | 3.28(-1.59-8.15)    | 3.70E-01 | 2.8(1.13-4.48)     | 3.03E-02 |
| Super Enhancer     | 16.72% | 2.56(2.23-2.89)     | <b>1.99E-20</b> | 2.69(2.27-3.11)    | 3.66E-11 | 3.32(2.47-4.17)    | 1.40E-07 | 2.82(0.5-5.14)        | 6.09E-02 | 2.17(1.62-2.73)     | 1.03E-05 | 1.91(0.86-2.95)     | 9.05E-02 | 2.58(2.04-3.12)    | 7.43E-08 |
| H3K27ac (PGC)      | 26.88% | 2.36(1.91-2.8)      | <b>2.12E-09</b> | 2.26(1.42-3.11)    | 4.91E-03 | 2.82(1.8-3.83)     | 1.59E-04 | 3.17(-0.6-6.94)       | 2.15E-01 | 2.57(1.54-3.59)     | 3.79E-03 | 3.37(1.45-5.28)     | 1.45E-02 | 1.75(0.91-2.59)    | 7.68E-02 |
| DGF                | 13.60% | 2.11(0.82-3.4)      | 9.04E-02        | 2.47(0.22-4.73)    | 2.05E-01 | 4.06(0.72-7.41)    | 6.99E-02 | -5.93(-19.66-7.8)     | 2.41E-01 | 0.2(-3.39-3.78)     | 6.61E-01 | -0.59(-7.44-6.26)   | 6.44E-01 | 2.13(-0.04-4.29)   | 3.17E-01 |
| Fetal DHS          | 8.39%  | 2.06(0.58-3.53)     | 1.60E-01        | 2.69(0.06-5.31)    | 2.14E-01 | 3.37(-0.32-7.05)   | 2.12E-01 | -3.74(-18.77-11.29)   | 5.30E-01 | 0.16(-4.07-4.39)    | 6.94E-01 | -1.55(-9.53-6.43)   | 5.02E-01 | 2.06(-0.41-4.53)   | 4.03E-01 |
| H3K27ac            | 38.91% | 1.9(1.65-2.15)      | 1.86E-12        | 2.01(1.7-2.32)     | 2.61E-08 | 2.16(1.74-2.59)    | 9.00E-09 | 1.96(0.32-3.59)       | 2.12E-01 | 1.38(0.99-1.78)     | 6.82E-02 | 1.87(1.17-2.58)     | 1.19E-02 | 2.02(1.7-2.34)     | 1.59E-08 |
| H3K4me1            | 42.37% | 1.84(1.56-2.12)     | <b>2.57E-09</b> | 2.04(1.59-2.49)    | 5.69E-06 | 1.89(1.25-2.53)    | 7.16E-03 | -0.59(-3.9-2.72)      | 2.76E-01 | 1.58(0.82-2.33)     | 1.41E-01 | 1.87(0.32-3.42)     | 2.57E-01 | 1.72(1.17-2.26)    | 1.17E-02 |
| Promoter           | 4.63%  | 1.33(-0.15-2.82)    | 6.61E-01        | 1.6(-0.31-3.52)    | 5.39E-01 | 1.45(-1.73-4.64)   | 7.78E-01 | -3.32(-17.28-10.64)   | 5.48E-01 | 3.16(-2.42-8.75)    | 4.49E-01 | 8.81(0.69-16.93)    | 3.18E-02 | -0.17(-2.56-2.21)  | 3.37E-01 |
| Transcribed Intron | 34.60% | 1.26(0.93-1.59)     | 1.19E-01        | 1.2(0.67-1.72)     | 4.57E-01 | 0.84(0.04-1.65)    | 7.00E-01 | 2.06(-0.86-4.99)      | 4.51E-01 | 1.73(0.81-2.65)     | 9.41E-02 | 1.82(0.16-3.48)     | 3.28E-01 | 1.27(0.64-1.9)     | 4.07E-01 |
| Intron             | 38.75% | 1.13(0.98-1.27)     | 8.14E-02        | 1.16(0.95-1.37)    | 1.19E-01 | 1.08(0.76-1.4)     | 6.15E-01 | 1.72(0.47-2.96)       | 2.04E-01 | 1.29(0.95-1.62)     | 7.77E-02 | 1.45(0.78-2.12)     | 1.44E-01 | 0.89(0.61-1.17)    | 4.49E-01 |
| Promoter Flanking  | 0.83%  | 0.55(-3.87-4.97)    | 8.41E-01        | -1.93(-7.76-3.89)  | 3.23E-01 | 1.05(-12.33-14.43) | 9.94E-01 | 8.56(-35.93-53.05)    | 7.37E-01 | 10.35(-4.71-25.42)  | 2.30E-01 | 13.98(-16.25-44.21) | 3.65E-01 | 1.39(-8.59-11.37)  | 9.38E-01 |
| Repressed          | 46.09% | 0.34(0.07-0.61)     | <b>1.15E-06</b> | 0.23(-0.19-0.66)   | 6.11E-04 | 0.33(-0.29-0.95)   | 3.71E-02 | 1.58(-0.82-3.99)      | 6.15E-01 | 0.06(-0.66-0.78)    | 9.90E-03 | -0.11(-1.51-1.29)   | 1.26E-01 | 0.69(0.15-1.24)    | 2.78E-01 |
| CTCF               | 2.39%  | -2.1(-4.88-0.69)    | 2.95E-02        | 0.19(-4.05-4.43)   | 7.06E-01 | -0.11(-7.32-7.09)  | 7.59E-01 | -8.92(-45.53-27.69)   | 5.71E-01 | -5.76(-14.44-2.91)  | 1.21E-01 | -11.17(-27.13-4.79) | 1.10E-01 | -4.23(-9.52-1.07)  | 4.72E-02 |

This meta-analysis was performed by using the enrichment estimates and standard errors calculated in LD score regression for each individual cancer type.

Bold font indicates significance after Bonferroni correction ( $P < 0.05/24$ ) in the meta-analysis.

TSS: transcription start site; UTR: untranslated region; TFBS: transcription factor binding sites; DHS: DNase I hypersensitive sites; DGF: digital genomic footprinting; CTCF: CCCTC-binding factor.

**Supplementary Table 4. Enrichment estimates for the 24 non-cell-type specific annotations in each of the cancer subtypes.**

| Category          | % SNP  | Breast Cancer Subtypes |          |                     |          | Lung Cancer Subtypes |          |                      |          | Ovarian Cancer Subtypes |          |                     |          | Prostate Cancer Subtypes |          |
|-------------------|--------|------------------------|----------|---------------------|----------|----------------------|----------|----------------------|----------|-------------------------|----------|---------------------|----------|--------------------------|----------|
|                   |        | ER-positive            |          | ER-negative         |          | Adenocarcinoma       |          | Ever smoking         |          | Squamous cell           |          | Serous              |          | Advanced stage           |          |
|                   |        | Enrichment (95% CI)    | P-value  | Enrichment (95% CI) | P-value  | Enrichment (95% CI)  | P-value  | Enrichment (95% CI)  | P-value  | Enrichment (95% CI)     | P-value  | Enrichment (95% CI) | P-value  | Enrichment (95% CI)      | P-value  |
| Coding region     | 1.43%  | 1.86(-2.71-6.43)       | 7.12E-01 | 9.72(1.9-17.55)     | 3.55E-02 | 8.28(-3.24-19.81)    | 2.18E-01 | 2.12(-12.86-17.1)    | 8.82E-01 | 9.49(-8.95-27.92)       | 3.54E-01 | 8.5(-3.49-20.5)     | 2.10E-01 | 16.09(5.7-26.48)         | 1.37E-03 |
| Conserved region  | 2.57%  | 8.36(2.14-14.57)       | 2.37E-02 | 6.73(-0.62-14.08)   | 1.28E-01 | 5.96(-3.72-15.65)    | 3.16E-01 | 11.73(0.55-22.9)     | 5.82E-02 | 28.26(6.14-50.39)       | 1.38E-03 | 21(-0.95-42.95)     | 6.20E-02 | 17.42(7.29-27.55)        | 4.81E-04 |
| CTCF              | 2.39%  | -1.24(-6.03-3.55)      | 3.58E-01 | 0.72(-5.28-6.73)    | 9.28E-01 | -8.21(-18.9-2.48)    | 8.68E-02 | -13.17(-27.39-1.05)  | 3.70E-02 | -7.28(-25.42-10.86)     | 3.74E-01 | -4.5(-15.57-6.57)   | 3.26E-01 | -6.23(-15.12-2.66)       | 8.74E-02 |
| DGF               | 13.60% | 3.68(1.22-6.14)        | 3.93E-02 | -0.5(-3.79-2.79)    | 3.68E-01 | -2.42(-7.26-2.43)    | 1.68E-01 | 0.18(-6.42-6.78)     | 8.04E-01 | 3.03(-6.07-12.12)       | 6.44E-01 | -1.29(-6.53-3.94)   | 3.75E-01 | 1.59(-2.22-5.39)         | 7.61E-01 |
| DHS               | 16.62% | 4.29(2.26-6.32)        | 3.34E-03 | 0.82(-1.86-3.51)    | 8.98E-01 | 1.5(-1.86-4.86)      | 7.71E-01 | 3.46(-0.7-7.61)      | 2.54E-01 | 3.51(-2.01-9.02)        | 3.67E-01 | 0.73(-2.93-4.38)    | 8.83E-01 | 4.19(1.1-7.28)           | 3.72E-02 |
| FANTOM5 Enhancer  | 0.43%  | 2.54(-14.7-19.77)      | 8.61E-01 | -7.79(-25.43-9.86)  | 3.19E-01 | -9.29(-36.73-18.15)  | 4.58E-01 | -18.77(-52.47-14.94) | 2.46E-01 | 46.47(-3.26-96.21)      | 3.03E-02 | 8.79(-21.19-38.76)  | 6.01E-01 | 22.3(-10.1-54.7)         | 1.82E-01 |
| Enhancer          | 4.20%  | 4.12(0.92-7.32)        | 5.37E-02 | 1.13(-3.39-5.65)    | 9.54E-01 | 7.74(1.85-13.64)     | 2.50E-02 | 6.58(-1.53-14.7)     | 1.78E-01 | 12.25(-0.12-24.61)      | 4.34E-02 | 2.06(-4.63-8.75)    | 7.54E-01 | 4.3(-0.88-9.47)          | 2.04E-01 |
| Fetal DHS         | 8.39%  | 3.44(0.84-6.04)        | 7.32E-02 | -1.04(-4.59-2.51)   | 2.58E-01 | 1.15(-4.43-6.73)     | 9.58E-01 | 2.53(-3.94-9)        | 6.45E-01 | 4.56(-3.26-12.39)       | 3.56E-01 | -1.07(-7.59-5.44)   | 5.25E-01 | 2.18(-2.15-6.51)         | 5.91E-01 |
| H3K27ac (Hnisz)   | 38.91% | 1.96(1.65-2.26)        | 1.50E-07 | 2.04(1.65-2.42)     | 1.59E-06 | 1.39(0.9-1.88)       | 1.41E-01 | 1.25(0.62-1.89)      | 4.35E-01 | 1.28(0.49-2.06)         | 4.99E-01 | 1.65(1.03-2.27)     | 3.49E-02 | 2.3(1.77-2.82)           | 2.87E-07 |
| H3K27ac (PGC)     | 26.88% | 2.45(1.58-3.31)        | 1.90E-03 | 2.34(1.26-3.42)     | 1.09E-02 | 2.92(1.58-4.26)      | 7.61E-03 | 3.49(1.7-5.29)       | 3.96E-03 | 3.29(0.96-5.62)         | 4.25E-02 | 2.33(0.87-3.79)     | 8.55E-02 | 2.37(0.92-3.81)          | 5.69E-02 |
| H3K4me1           | 42.37% | 1.99(1.5-2.48)         | 1.15E-04 | 2.31(1.62-3)        | 2.33E-04 | 1.83(0.85-2.81)      | 1.01E-01 | 1.7(0.51-2.89)       | 2.57E-01 | 1.84(0.13-3.56)         | 3.31E-01 | 1.65(0.41-2.88)     | 3.04E-01 | 2.05(1.27-2.83)          | 9.92E-03 |
| H3K4me3           | 13.30% | 4.54(2.86-6.22)        | 6.64E-05 | 2.82(0.85-4.79)     | 7.51E-02 | 3.28(0.81-5.76)      | 6.80E-02 | 1.89(-0.92-4.71)     | 5.28E-01 | 1.28(-2.41-4.97)        | 8.82E-01 | 0.98(-1.69-3.64)    | 9.87E-01 | 2.95(0.86-5.04)          | 6.87E-02 |
| H3K9ac            | 12.54% | 4.3(2.2-6.4)           | 2.33E-03 | 2.11(-0.09-4.3)     | 3.26E-01 | 3.13(0.17-6.09)      | 1.61E-01 | 1.98(-1.08-5.03)     | 5.28E-01 | 2.27(-1.44-5.98)        | 4.99E-01 | 1.6(-1.76-4.96)     | 7.28E-01 | 4.93(2.38-7.47)          | 1.03E-03 |
| Intron            | 38.75% | 1.13(0.9-1.36)         | 2.71E-01 | 1.13(0.85-1.41)     | 3.48E-01 | 1.15(0.72-1.59)      | 4.85E-01 | 1.34(0.74-1.94)      | 2.28E-01 | 1.61(0.84-2.37)         | 6.55E-02 | 1.28(0.79-1.77)     | 2.43E-01 | 0.7(0.3-1.1)             | 1.27E-01 |
| Promoter Flanking | 0.83%  | -5.33(-11.24-0.58)     | 3.59E-02 | 9.42(-4.73-23.57)   | 2.40E-01 | 13.33(-4.22-30.89)   | 1.81E-01 | 13.4(-11.97-38.77)   | 3.36E-01 | -8.77(-35.92-18.37)     | 4.67E-01 | -6.34(-28.97-16.29) | 5.19E-01 | 5.39(-9.7-20.47)         | 5.67E-01 |
| Promoter          | 4.63%  | 1.37(-0.52-3.27)       | 7.00E-01 | 0.23(-2.83-3.3)     | 6.25E-01 | 1.71(-4.49-7.91)     | 8.18E-01 | 7.21(-1.3-15.72)     | 1.73E-01 | 5.07(-4.36-14.5)        | 3.95E-01 | 6.17(0.98-11.36)    | 4.99E-02 | -0.47(-4.26-3.32)        | 4.42E-01 |
| Repressed region  | 46.09% | 0.17(-0.26-0.61)       | 3.03E-04 | 0.38(-0.34-1.1)     | 9.78E-02 | 0.54(-0.4-1.48)      | 3.31E-01 | 0.22(-1.05-1.49)     | 2.17E-01 | -0.17(-1.84-1.5)        | 1.13E-01 | 0.39(-0.72-1.5)     | 2.95E-01 | 0.96(0.18-1.74)          | 9.25E-01 |
| Super Enhancer    | 16.72% | 2.62(2.16-3.09)        | 1.18E-10 | 2.42(1.85-2.98)     | 8.93E-06 | 1.94(1.19-2.7)       | 1.05E-02 | 2.37(1.41-3.33)      | 2.29E-03 | 2.8(1.24-4.35)          | 3.81E-03 | 1.77(0.96-2.59)     | 6.73E-02 | 2.84(2.01-3.66)          | 7.94E-06 |
| TFBS              | 13.12% | 5.42(3.33-7.51)        | 1.24E-04 | 2.43(0.19-4.67)     | 2.15E-01 | 2.06(-1.47-5.59)     | 5.57E-01 | 5.47(0.67-10.27)     | 5.99E-02 | 3.58(-2.34-9.51)        | 3.83E-01 | 2.14(-2.81-7.1)     | 6.53E-01 | 1.86(-1.02-4.73)         | 5.62E-01 |
| Transcribed       | 34.60% | 1.17(0.62-1.71)        | 5.51E-01 | 1.43(0.59-2.27)     | 3.19E-01 | 1.6(0.35-2.85)       | 3.20E-01 | 1.83(0.27-3.4)       | 2.58E-01 | 1.46(-0.33-3.26)        | 5.91E-01 | 1.59(0.25-2.92)     | 3.88E-01 | 0.8(-0.04-1.63)          | 6.28E-01 |
| TSS               | 1.78%  | 7.32(3-11.63)          | 5.56E-03 | 1.23(-4.69-7.15)    | 9.39E-01 | -0.11(-11.57-11.36)  | 8.49E-01 | 2.79(-9.26-14.85)    | 7.70E-01 | 12.3(-2.93-27.54)       | 1.14E-01 | 1.74(-11.81-15.28)  | 9.15E-01 | 10.26(1.44-19.08)        | 2.84E-02 |
| 3' UTR            | 1.12%  | 0.82(-3.84-5.47)       | 9.38E-01 | 2.48(-2.9-7.86)     | 5.95E-01 | 5.93(-3.09-14.95)    | 2.73E-01 | 0.83(-9.29-10.94)    | 9.73E-01 | -2.05(-18.07-13.96)     | 7.07E-01 | 17.54(4.52-30.55)   | 4.67E-03 | 13.9(3.97-23.83)         | 6.26E-03 |
| 5' UTR            | 0.55%  | 3.44(-3.64-10.51)      | 5.00E-01 | 11.74(0.54-22.94)   | 6.54E-02 | 5.12(-14.23-24.46)   | 6.78E-01 | 1.67(-16.59-19.93)   | 9.42E-01 | -6.19(-32.08-19.69)     | 5.79E-01 | 3.79(-13.55-21.13)  | 7.53E-01 | 20.53(4.88-36.17)        | 8.33E-03 |
| Weak Enhancer     | 2.10%  | 2.88(-2.58-8.34)       | 5.01E-01 | 3.1(-5.38-11.59)    | 6.27E-01 | -4.19(-15.93-7.56)   | 3.77E-01 | 4.16(-8.74-17.06)    | 6.29E-01 | 8.84(-10.01-27.69)      | 3.97E-01 | 4.74(-8.73-18.22)   | 5.88E-01 | 5.4(-7.35-18.14)         | 4.96E-01 |

TSS: transcription start site; UTR: untranslated region; TFBS: transcription factor binding sites; DHS: DNase I hypersensitive sites; DGF: digital genomic footprinting; CTCF: CCTC-binding factor.

**Supplementary Table 5. Quality control and imputation procedures of each cancer.**

| Cancer type          | Imputation algorithm                                                                                                          | Imputation reference panel                                               | Included SNPs for association                                                                                                                   | Other data cleaning strategy                                                                                                                                                                                                                                                                                                                                                                                                                                                                                                                                                                                                                                                                                                                                                                                                                                                                                                                                                                                                                                                                                                                                                                                                                                                                                                                                                                                                                                                                                                                                                                                                                                                                                                                                                                                                                                                                                                                                                                                                                                                                                                                                                                                                                                                                                                                                                                                                                                                                                                                                                                                                                                                                                                                                                                                                                                                                                                                                                                                                                                                                                                                                                                                                                                                                                                                                                                                                                                                                                                                                                                                                                                                                                                                                                                                                                                                                                                                                                                                                                                                                                                                                                                                                    |
|----------------------|-------------------------------------------------------------------------------------------------------------------------------|--------------------------------------------------------------------------|-------------------------------------------------------------------------------------------------------------------------------------------------|---------------------------------------------------------------------------------------------------------------------------------------------------------------------------------------------------------------------------------------------------------------------------------------------------------------------------------------------------------------------------------------------------------------------------------------------------------------------------------------------------------------------------------------------------------------------------------------------------------------------------------------------------------------------------------------------------------------------------------------------------------------------------------------------------------------------------------------------------------------------------------------------------------------------------------------------------------------------------------------------------------------------------------------------------------------------------------------------------------------------------------------------------------------------------------------------------------------------------------------------------------------------------------------------------------------------------------------------------------------------------------------------------------------------------------------------------------------------------------------------------------------------------------------------------------------------------------------------------------------------------------------------------------------------------------------------------------------------------------------------------------------------------------------------------------------------------------------------------------------------------------------------------------------------------------------------------------------------------------------------------------------------------------------------------------------------------------------------------------------------------------------------------------------------------------------------------------------------------------------------------------------------------------------------------------------------------------------------------------------------------------------------------------------------------------------------------------------------------------------------------------------------------------------------------------------------------------------------------------------------------------------------------------------------------------------------------------------------------------------------------------------------------------------------------------------------------------------------------------------------------------------------------------------------------------------------------------------------------------------------------------------------------------------------------------------------------------------------------------------------------------------------------------------------------------------------------------------------------------------------------------------------------------------------------------------------------------------------------------------------------------------------------------------------------------------------------------------------------------------------------------------------------------------------------------------------------------------------------------------------------------------------------------------------------------------------------------------------------------------------------------------------------------------------------------------------------------------------------------------------------------------------------------------------------------------------------------------------------------------------------------------------------------------------------------------------------------------------------------------------------------------------------------------------------------------------------------------------------------|
| <b>Breast</b>        | Part of the data used SHAPEIT for phasing and IMPUTEv2 for imputation; Part of the data used MACH and Minimac for imputation. | The October 2014 (version 3) release of the 1000 Genomes Project dataset | Imputation r-square > 0.30                                                                                                                      | <p>SNPs with a call rate &lt;95% in any consortium, SNPs not in Hardy-Weinberg equilibrium (<math>P &lt; 10^{-7}</math> in controls or <math>P &lt; 10^{-12}</math> in cases) and SNPs with concordance &lt;98% among duplicate sample pairs were excluded. For the imputation, SNPs with a MAF &lt;1% and a call rate &lt;98% in any consortium, SNPs that could not be linked to the 1000 Genomes Project reference or differed significantly in frequency from the 1000 Genomes Project dataset were additionally excluded. A further 1,128 SNPs where the cluster plot was judged to be not ideal on visual inspection were excluded. Standard QC filters were applied. A first round of filtering excluded samples with &lt;80% call rate, then variants with &lt;80% call rate. Next, samples with &lt;95% call rate were excluded as well as those marked for removal from various QC checks such as replicate concordance (within and across platforms), unexpected replicate search (within and across platforms), genotyped vs. reported sex concordance, plate mix-ups, and removal due to lack of consent. Markers were then excluded based on the following criteria: 1) &lt;95% call rate; 2) duplicate error rate &gt;1% (only in matching reps with call rate <math>\geq 99\%</math>) or heterozygote duplicate error rate &gt;5% and &gt;2 het mismatches, and 3) SNPs with duplicate probes.</p> <p>An initial filtering step on the complete dataset excluded samples with genotyping rate &lt;80% and SNPs with call rate &lt;80%. During the individuals QC, samples with unsolved genetic and reported sex discrepancies and individuals with outlying autosomic heterozygosity rate were removed. Identity-by-descent (IBD) analysis performed on the LD-pruned dataset identified 103 expected experimental duplicate-pairs (IBD &gt; 0.9), from these the sample with lower genotyping rate were excluded. Additionally, 44 unexpected relative pairs (IBD &gt; 0.3) were identified and excluded. SNPs with deviation of Hardy-Weinberg Equilibrium in controls (<math>P &lt; 1 \times 10^{-7}</math>) were further excluded. Standard quality control procedures were used to exclude underperforming individuals (DNAs) and genotyping assays (judged by success rate, genotype distributions deviated from that expected by Hardy Weinberg equilibrium). Samples were subjected to genotype calling rate and individual calling rate check. 1,708 individuals were removed for call rate less than 95%, and 16,149 SNPs with call rates of less than 95% were removed. After filtering, there were 517,482 SNPs available for analysis. We applied the standard OncoArray consortium filter for removing SNPs if they showed departure from Hardy-Weinberg equilibrium in the controls (<math>P</math>-value <math>&lt; 1 \times 10^{-7}</math>) or cases (<math>P</math>-value <math>&lt; 1 \times 10^{-12}</math>).</p> <p>Samples were excluded if they had a genotyping call rate &lt;95%, if they had excessively low or high heterozygosity, if they were not female or if they were duplicates. Duplicates and close relatives were identified using in-house software that calculates a concordance matrix for all individuals. SNP quality control was carried out according to the OncoArray QC Guidelines. Only SNPs that passed quality control for all consortia were used for imputation. SNPs with a call rate &lt;95%, SNPs deviating from Hardy-Weinberg equilibrium (<math>P &lt; 1 \times 10^{-7}</math> in controls or unrelated samples in CIMBA and <math>P &lt; 1 \times 10^{-12}</math> in cases) and SNPs with concordance &lt;98% among duplicate pairs were excluded. Variants likely to have problematic clusters were selected for manual inspection on the basis of the following criteria: call rate &lt;99%, MAF &lt;0.001, poor Illumina intensity and clustering metrics, deviation from the MAF observed in the 1KGP. SNPs with a call rate &lt;95% by study, not in Hardy-Weinberg equilibrium (<math>P &lt; 10^{-7}</math> in controls or <math>P &lt; 10^{-12}</math> in cases) or with concordance &lt;98% among duplicate pairs were further excluded.</p> |
| <b>Colorectal</b>    | SHAPEIT for phasing and IMPUTE2v2 for imputation.                                                                             | The October 2014 (version 3) release of the 1000 Genomes Project dataset | Imputation info $\geq 0.7$ , certainty $\geq 0.9$ , concordance $\geq 0.9$ for directly measured markers as well as a MAF filter of $\geq 0.01$ |                                                                                                                                                                                                                                                                                                                                                                                                                                                                                                                                                                                                                                                                                                                                                                                                                                                                                                                                                                                                                                                                                                                                                                                                                                                                                                                                                                                                                                                                                                                                                                                                                                                                                                                                                                                                                                                                                                                                                                                                                                                                                                                                                                                                                                                                                                                                                                                                                                                                                                                                                                                                                                                                                                                                                                                                                                                                                                                                                                                                                                                                                                                                                                                                                                                                                                                                                                                                                                                                                                                                                                                                                                                                                                                                                                                                                                                                                                                                                                                                                                                                                                                                                                                                                                 |
| <b>Head and neck</b> | SHAPEIT for phasing, and Minimac3 for imputation                                                                              | The Haplotype Reference Consortium panel                                 | Imputation r-square > 0.30                                                                                                                      |                                                                                                                                                                                                                                                                                                                                                                                                                                                                                                                                                                                                                                                                                                                                                                                                                                                                                                                                                                                                                                                                                                                                                                                                                                                                                                                                                                                                                                                                                                                                                                                                                                                                                                                                                                                                                                                                                                                                                                                                                                                                                                                                                                                                                                                                                                                                                                                                                                                                                                                                                                                                                                                                                                                                                                                                                                                                                                                                                                                                                                                                                                                                                                                                                                                                                                                                                                                                                                                                                                                                                                                                                                                                                                                                                                                                                                                                                                                                                                                                                                                                                                                                                                                                                                 |
| <b>Lung</b>          | SHAPEIT for phasing and IMPUTE2v2 for imputation.                                                                             | The October 2014 (version 3) release of the 1000 Genomes Project dataset | Imputation r-square > 0.30 and info > 0.40                                                                                                      |                                                                                                                                                                                                                                                                                                                                                                                                                                                                                                                                                                                                                                                                                                                                                                                                                                                                                                                                                                                                                                                                                                                                                                                                                                                                                                                                                                                                                                                                                                                                                                                                                                                                                                                                                                                                                                                                                                                                                                                                                                                                                                                                                                                                                                                                                                                                                                                                                                                                                                                                                                                                                                                                                                                                                                                                                                                                                                                                                                                                                                                                                                                                                                                                                                                                                                                                                                                                                                                                                                                                                                                                                                                                                                                                                                                                                                                                                                                                                                                                                                                                                                                                                                                                                                 |
| <b>Ovarian</b>       | SHAPEIT for phasing and IMPUTE2v2 for imputation.                                                                             | The October 2014 (version 3) release of the 1000 Genomes Project dataset | Imputation r-square > 0.30 and MAF > 0.01.                                                                                                      |                                                                                                                                                                                                                                                                                                                                                                                                                                                                                                                                                                                                                                                                                                                                                                                                                                                                                                                                                                                                                                                                                                                                                                                                                                                                                                                                                                                                                                                                                                                                                                                                                                                                                                                                                                                                                                                                                                                                                                                                                                                                                                                                                                                                                                                                                                                                                                                                                                                                                                                                                                                                                                                                                                                                                                                                                                                                                                                                                                                                                                                                                                                                                                                                                                                                                                                                                                                                                                                                                                                                                                                                                                                                                                                                                                                                                                                                                                                                                                                                                                                                                                                                                                                                                                 |
| <b>Prostate</b>      | SHAPEIT for phasing and IMPUTE2v2 for imputation.                                                                             | The October 2014 (version 3) release of the 1000 Genomes Project dataset | Imputation r-square > 0.30                                                                                                                      |                                                                                                                                                                                                                                                                                                                                                                                                                                                                                                                                                                                                                                                                                                                                                                                                                                                                                                                                                                                                                                                                                                                                                                                                                                                                                                                                                                                                                                                                                                                                                                                                                                                                                                                                                                                                                                                                                                                                                                                                                                                                                                                                                                                                                                                                                                                                                                                                                                                                                                                                                                                                                                                                                                                                                                                                                                                                                                                                                                                                                                                                                                                                                                                                                                                                                                                                                                                                                                                                                                                                                                                                                                                                                                                                                                                                                                                                                                                                                                                                                                                                                                                                                                                                                                 |

**Supplementary Table 6. Numbers of individuals and SNPs involved in the GWAS summary data of 38 traits.**

| Trait Identifier                     | Reference                                    | Numbers of individuals | Numbers of SNPs | Original files                                                                                                                                                                                |
|--------------------------------------|----------------------------------------------|------------------------|-----------------|-----------------------------------------------------------------------------------------------------------------------------------------------------------------------------------------------|
| Lupus (Systemic Lupus Erythematosus) | Bentham et al., 2015 Nat Genet               | 14,267                 | 654,940         | <a href="https://www.immunobase.org/downloads/protected_data/GWAS_Data/">https://www.immunobase.org/downloads/protected_data/GWAS_Data/</a>                                                   |
| Primary Biliary Cirrhosis            | Cordell et al., 2015 Nat Commun              | 13,239                 | 525,775         | <a href="https://www.immunobase.org/downloads/protected_data/GWAS_Data/">https://www.immunobase.org/downloads/protected_data/GWAS_Data/</a>                                                   |
| Celiac Disease                       | Dubois et al., 2010 Nat Genet                | 15,283                 | 245,449         | <a href="https://www.immunobase.org/downloads/protected_data/GWAS_Data/">https://www.immunobase.org/downloads/protected_data/GWAS_Data/</a>                                                   |
| Autism                               | PGC Cross-Disorder Group, 2013 Lancet        | 10,263                 | 1,173,308       | <a href="http://www.med.unc.edu/pgc/files/resultfiles/pgcasdeuro.gz">http://www.med.unc.edu/pgc/files/resultfiles/pgcasdeuro.gz</a>                                                           |
| Bipolar Disorder                     | BIP Working Group of the PGC, 2011 Nat Genet | 16,731                 | 750,636         | <a href="http://www.med.unc.edu/pgc/downloads/">http://www.med.unc.edu/pgc/downloads/</a>                                                                                                     |
| Anorexia                             | Boraska et al., 2014 Mol Psych               | 32,143                 | 931,185         | <a href="http://www.med.unc.edu/pgc/downloads/">http://www.med.unc.edu/pgc/downloads/</a>                                                                                                     |
| Schizophrenia                        | SCZ Working Group of the PGC, 2014 Nature    | 70,100                 | 1,083,015       | <a href="http://www.med.unc.edu/pgc/downloads/">http://www.med.unc.edu/pgc/downloads/</a>                                                                                                     |
| Fasting Glucose                      | Manning et al., 2012 Nat Genet               | 46,186                 | 1,115,625       | <a href="http://www.magicinvestigators.org/downloads/">http://www.magicinvestigators.org/downloads/</a>                                                                                       |
| Inflammatory Bowel Disease           | Jostins et al., 2012 Nature                  | 34,652                 | 1,078,061       | <a href="http://www.ibdgenetics.org/downloads.html">http://www.ibdgenetics.org/downloads.html</a>                                                                                             |
| Crohns Disease                       | Jostins et al., 2012 Nature                  | 20,883                 | 1,051,515       | <a href="http://www.ibdgenetics.org/downloads.html">http://www.ibdgenetics.org/downloads.html</a>                                                                                             |
| Ulcerative Colitis                   | Jostins et al., 2012 Nature                  | 27,432                 | 1,076,835       | <a href="http://www.ibdgenetics.org/downloads.html">http://www.ibdgenetics.org/downloads.html</a>                                                                                             |
| Type 2 Diabetes                      | Morris et al., 2012 Nat Genet                | 60,786                 | 968,539         | <a href="http://www.diagram-consortium.org/">http://www.diagram-consortium.org/</a>                                                                                                           |
| Coronary Artery Disease              | Schunkert et al., 2011 Nat Genet             | 77,210                 | 925,224         | <a href="http://www.cardiogramplusc4d.org/">http://www.cardiogramplusc4d.org/</a>                                                                                                             |
| Body Mass Index                      | Locke et al., 2015 Nature                    | 322,151                | 2,554,638       | <a href="http://www.broadinstitute.org/collaboration/giant/index.php/GIANT_consortium_data_files">http://www.broadinstitute.org/collaboration/giant/index.php/GIANT_consortium_data_files</a> |
| Height                               | Wood et al., 2014 Nat Genet                  | 253,280                | 2,550,859       | <a href="http://www.broadinstitute.org/collaboration/giant/index.php/GIANT_consortium_data_files">http://www.broadinstitute.org/collaboration/giant/index.php/GIANT_consortium_data_files</a> |
| Subject Well Being                   | Okbay et al., 2016 Nat Genet                 | 298,420                | 477,900         | <a href="http://ssgac.org/documents/SWB_Full.txt.gz">http://ssgac.org/documents/SWB_Full.txt.gz</a>                                                                                           |
| Neuroticism                          | Okbay et al., 2016 Nat Genet                 | 170,911                | 1,115,394       | <a href="http://ssgac.org/documents/Neuroticism_Full.txt.gz">http://ssgac.org/documents/Neuroticism_Full.txt.gz</a>                                                                           |
| Years of Education                   | Okbay et al., 2016 Nature                    | 328,917                | 1,167,614       | <a href="http://ssgac.org/documents/EduYears_Main.txt.gz">http://ssgac.org/documents/EduYears_Main.txt.gz</a>                                                                                 |
| Depressive Symptoms                  | Okbay et al., 2016 Nat Genet                 | 161,460                | 1,115,394       | <a href="http://ssgac.org/documents/DS_Full.txt.gz">http://ssgac.org/documents/DS_Full.txt.gz</a>                                                                                             |
| Rheumatoid Arthritis                 | Okada et al., 2014 Nature                    | 37,681                 | 562,682         | <a href="http://plaza.umin.ac.jp/yokada/datasource/software.html">http://plaza.umin.ac.jp/yokada/datasource/software.html</a>                                                                 |
| High-density Lipoprotein             | Willer et al., 2013 Nat Genet                | 187,167                | 2,447,442       | <a href="http://csg.sph.umich.edu//abecasis/public/lipids2013/">http://csg.sph.umich.edu//abecasis/public/lipids2013/</a>                                                                     |
| Triglycerides                        | Willer et al., 2013 Nat Genet                | 177,860                | 2,439,433       | <a href="http://csg.sph.umich.edu//abecasis/public/lipids2013/">http://csg.sph.umich.edu//abecasis/public/lipids2013/</a>                                                                     |
| Low-density Lipoprotein              | Willer et al., 2013 Nat Genet                | 173,082                | 2,437,752       | <a href="http://csg.sph.umich.edu//abecasis/public/lipids2013/">http://csg.sph.umich.edu//abecasis/public/lipids2013/</a>                                                                     |
| Sleep Duration                       | Lane et al., 2016 Nat Genet                  | 111,978                | 9,401,335       | UKBiobank                                                                                                                                                                                     |
| Sleep Chronotype                     | Lane et al., 2016 Nat Genet                  | 100,420                | 8,526,705       | UKBiobank                                                                                                                                                                                     |
| Insomnia                             | Lane et al., 2016 Nat Genet                  | 58,702                 | 9,401,335       | UKBiobank                                                                                                                                                                                     |
| Age at Menarche                      | UKBiobank                                    | 74,944                 | 1,187,029       | UKBiobank                                                                                                                                                                                     |
| Age at Menopause                     | UKBiobank                                    | 44,410                 | 1,187,051       | UKBiobank                                                                                                                                                                                     |
| Asthma                               | UKBiobank                                    | 145,416                | 1,187,053       | UKBiobank                                                                                                                                                                                     |
| Diastolic Blood Pressure             | UKBiobank                                    | 134,011                | 1,186,980       | UKBiobank                                                                                                                                                                                     |
| Systolic Blood Pressure              | UKBiobank                                    | 134,011                | 1,187,025       | UKBiobank                                                                                                                                                                                     |
| Eczema                               | UKBiobank                                    | 145,416                | 1,187,034       | UKBiobank                                                                                                                                                                                     |
| Heel T-Score                         | UKBiobank                                    | 141,441                | 1,185,277       | UKBiobank                                                                                                                                                                                     |
| Hypertension                         | UKBiobank                                    | 145,379                | 1,187,099       | UKBiobank                                                                                                                                                                                     |
| Lung FEV1/FVC Ratio                  | UKBiobank                                    | 123,935                | 1,186,631       | UKBiobank                                                                                                                                                                                     |
| Forced Vital Capacity                | UKBiobank                                    | 123,935                | 1,187,014       | UKBiobank                                                                                                                                                                                     |
| Smoking Status                       | UKBiobank                                    | 145,227                | 1,187,111       | UKBiobank                                                                                                                                                                                     |
| Waist Hip Ratio (BMI adjusted)       | UKBiobank                                    | 145,375                | 1,186,973       | UKBiobank                                                                                                                                                                                     |

**Supplementary Table 7. Total SNP-heritability and z-score in each of the 38 traits.**

| <b>Trait Identifier</b>              | <b>h<sup>2</sup></b> | <b>standard error</b> | <b>Z</b> |
|--------------------------------------|----------------------|-----------------------|----------|
| Lupus (Systemic Lupus Erythematosus) | 0.45                 | 0.065                 | 7.0      |
| Celiac Disease                       | 0.36                 | 0.048                 | 7.6      |
| Fasting Glucose                      | 0.10                 | 0.013                 | 7.7      |
| Primary Biliary Cirrhosis            | 0.50                 | 0.063                 | 7.8      |
| Autism                               | 0.45                 | 0.056                 | 8.1      |
| Type 2 Diabetes                      | 0.09                 | 0.011                 | 8.3      |
| Coronary Artery Disease              | 0.08                 | 0.010                 | 8.9      |
| Subject Well Being                   | 0.03                 | 0.003                 | 9.0      |
| Neuroticism                          | 0.08                 | 0.009                 | 9.2      |
| Ulcerative Colitis                   | 0.27                 | 0.029                 | 9.3      |
| Bipolar Disorder                     | 0.39                 | 0.042                 | 9.3      |
| Age at Menopause                     | 0.13                 | 0.014                 | 9.5      |
| Triglycerides                        | 0.11                 | 0.012                 | 9.8      |
| Rheumatoid Arthritis                 | 0.18                 | 0.018                 | 10.0     |
| Low-density lipoprotein              | 0.10                 | 0.010                 | 10.4     |
| Sleep Duration                       | 0.06                 | 0.006                 | 10.4     |
| Crohns Disease                       | 0.55                 | 0.052                 | 10.5     |
| Depressive Symptoms                  | 0.04                 | 0.004                 | 10.9     |
| Anorexia                             | 0.19                 | 0.017                 | 11.0     |
| High-density lipoprotein             | 0.12                 | 0.011                 | 11.3     |
| Asthma                               | 0.07                 | 0.006                 | 11.4     |
| Eczema                               | 0.07                 | 0.006                 | 11.6     |
| Inflammatory Bowel Disease           | 0.36                 | 0.030                 | 12.0     |
| Insomnia                             | 0.13                 | 0.011                 | 12.1     |
| Body Mass Index                      | 0.13                 | 0.008                 | 16.9     |
| Sleep Chronotype                     | 0.12                 | 0.007                 | 17.6     |
| Age at Menarche                      | 0.21                 | 0.012                 | 18.0     |
| Heel T-Score                         | 0.29                 | 0.016                 | 18.6     |
| Hypertension                         | 0.11                 | 0.006                 | 18.7     |
| Waist Hip ratio                      | 0.15                 | 0.008                 | 19.3     |
| Height                               | 0.22                 | 0.011                 | 19.7     |
| Smoking Status                       | 0.11                 | 0.005                 | 20.1     |
| Schizophrenia                        | 0.40                 | 0.019                 | 20.8     |
| Lung FEV1/FVC Ratio                  | 0.24                 | 0.011                 | 22.0     |
| Systolic Blood Pressure              | 0.19                 | 0.008                 | 24.0     |
| Diastolic Blood Pressure             | 0.20                 | 0.008                 | 24.5     |
| Years of Education                   | 0.10                 | 0.004                 | 26.6     |
| Forced Vital Capacity                | 0.23                 | 0.008                 | 28.9     |

Z-scores were calculated for each trait dividing the SNP-heritability by its standard error. We restricted our analysis to traits for which the z-score was at least 7.

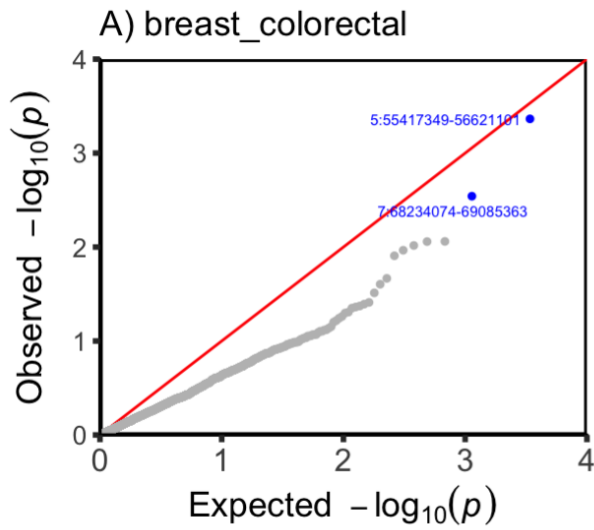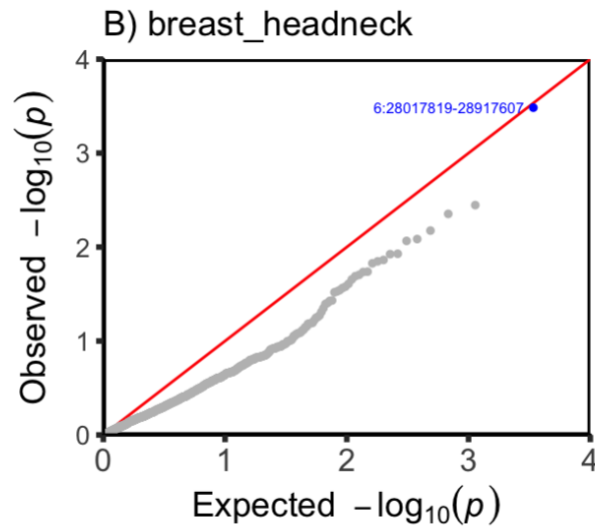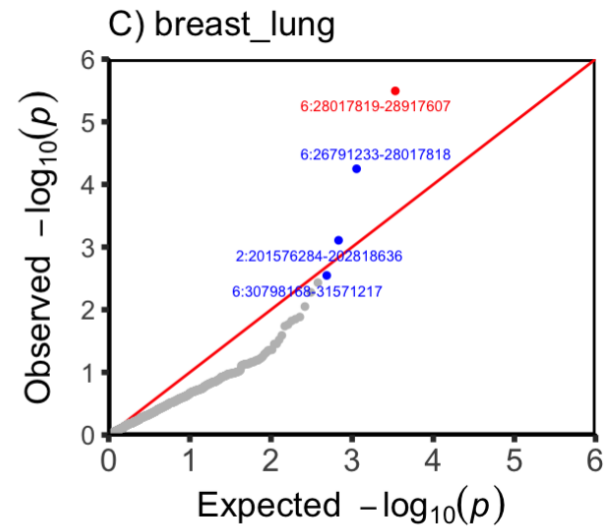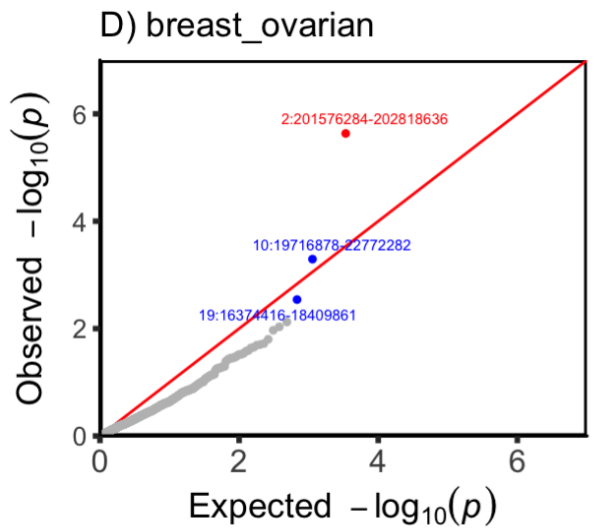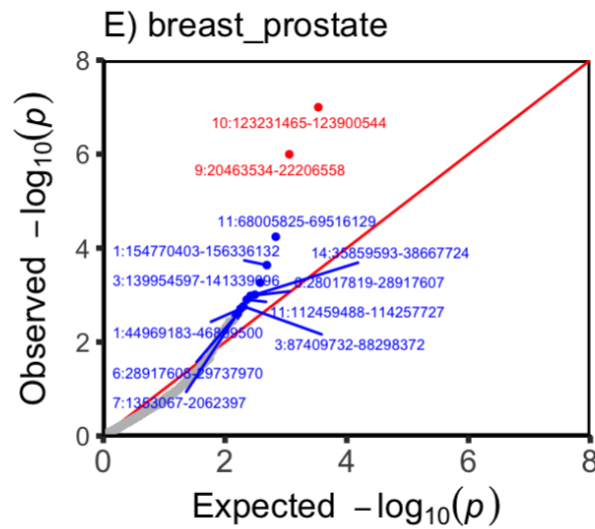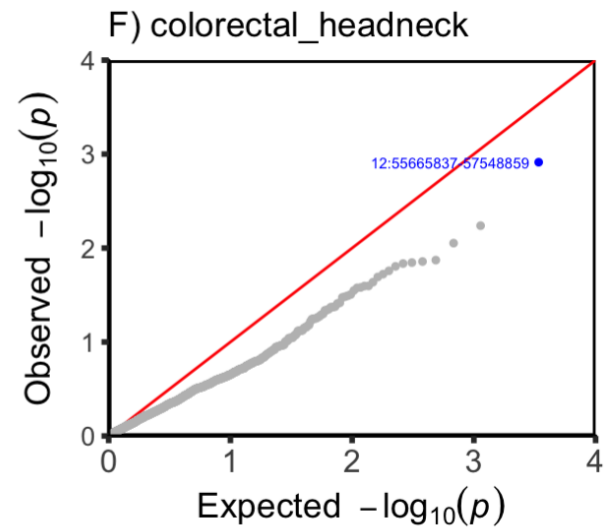



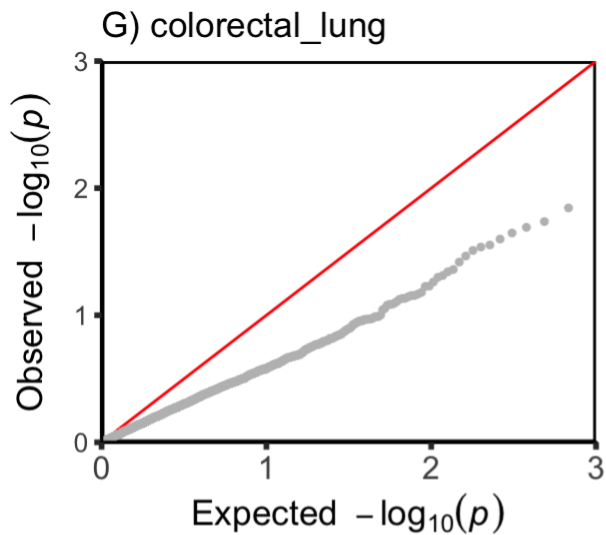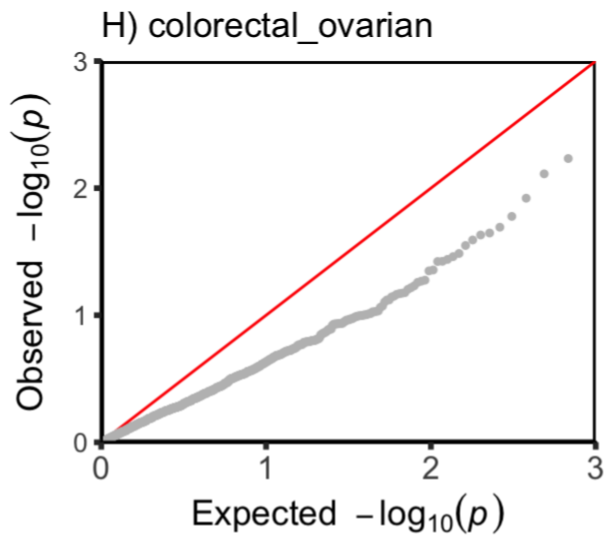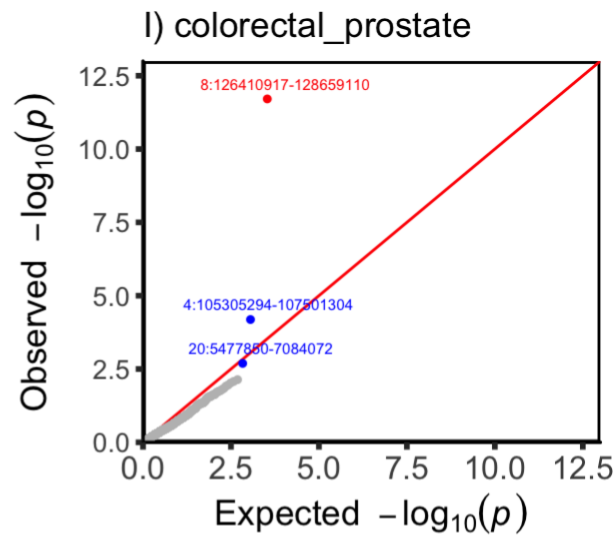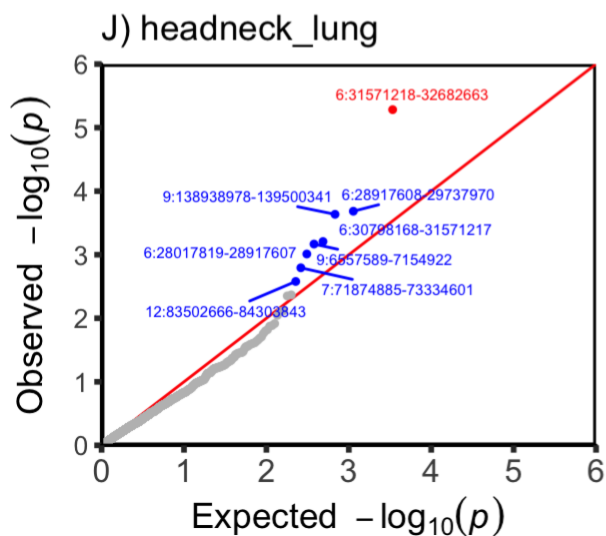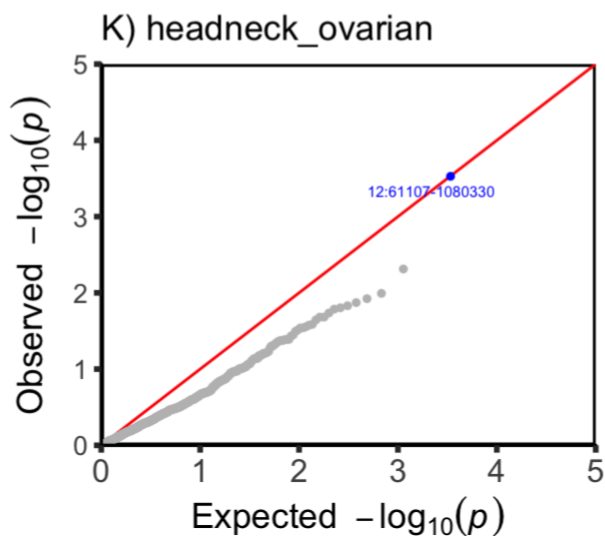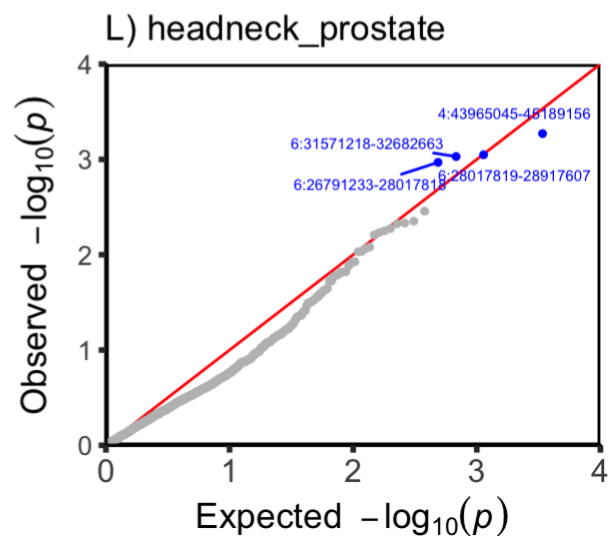

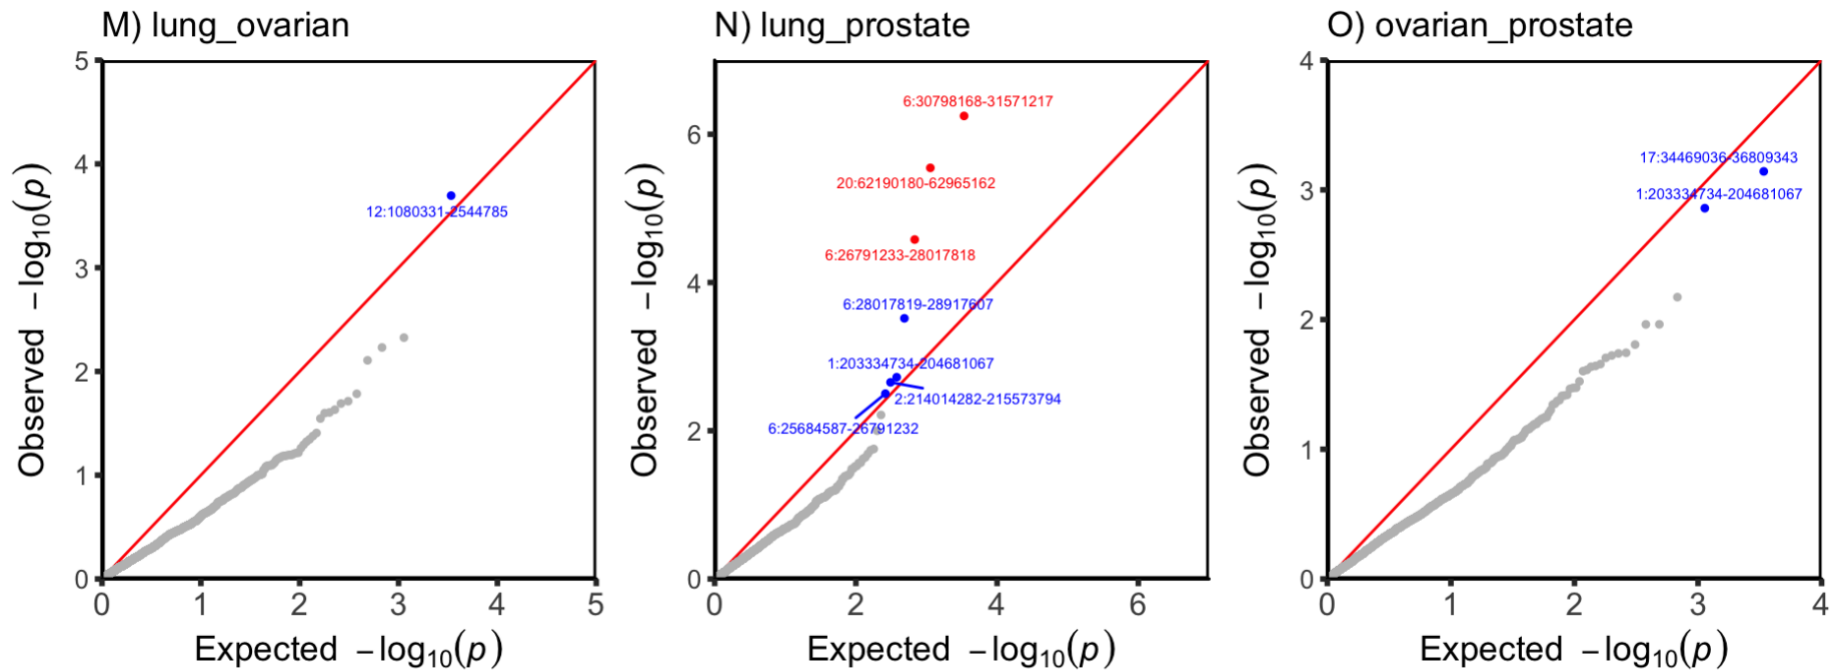

**Supplementary Figure 1. Local genetic correlation between six cancers.**

QQ-plots showing region-specific p-values for the local genetic covariance for breast and colorectal cancer (A), breast and head/neck cancer (B), breast and lung cancer (C), breast and ovarian cancer (D), breast and prostate cancer (E), colorectal and head/neck cancer (F), colorectal and lung cancer (G), colorectal and ovarian cancer (H), colorectal and prostate cancer (I), head/neck and lung cancer (J), head/neck and ovarian cancer (K), head/neck and prostate cancer (L), lung and ovarian cancer (M), lung and prostate cancer (N), ovarian and prostate cancer (O). Each dot presents a specific genomic region. In the QQ plots, red color indicates significance after multiple corrections ( $p < 0.05/1,703$  regions compared), and blue color indicates nominal significance ( $p < 0.05/15$  pairs of cancers compared).

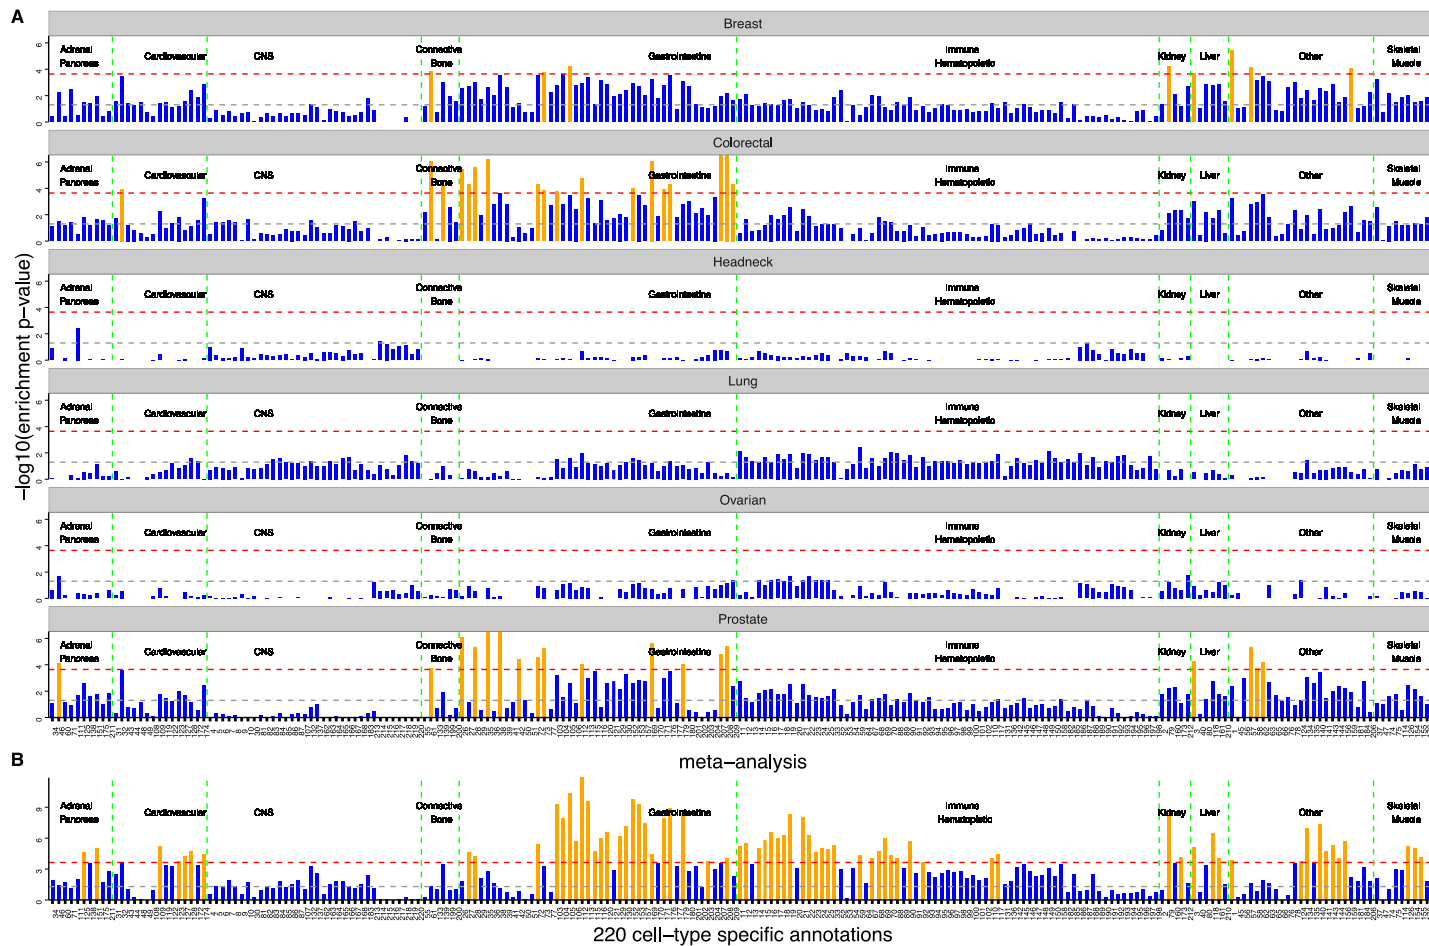

### Supplementary Figure 2. Cell-type-specific functional enrichment in six cancers.

A) Enrichment p-values of 220 cell-type-specific annotations in six major cancer types. The x-axis represents each of the 220 cell types, y-axis represents the log-transformed p-values of enrichment. Annotations with statistical significance after Bonferroni corrections ( $p < 0.05/220$ ) were plotted in orange, otherwise blue. The horizontal grey dash line indicates p-threshold of 0.05; horizontal red dash line indicates p-threshold of  $0.05/220$ . The vertical green dash lines separate 220 cell types into ten cell type groups: adrenal and pancreas, cardiovascular, central nervous system, connective and bone, gastrointestinal, immune and hematopoietic system, kidney, liver, skeletal muscle, and others. From top to bottom are six panels representing six cancers: breast cancer, colorectal cancer, head/neck cancer, lung cancer, ovarian cancer, and prostate cancer. B). Enrichment p-values of the 220 cell-type-specific annotations meta-analyzed across six cancers.

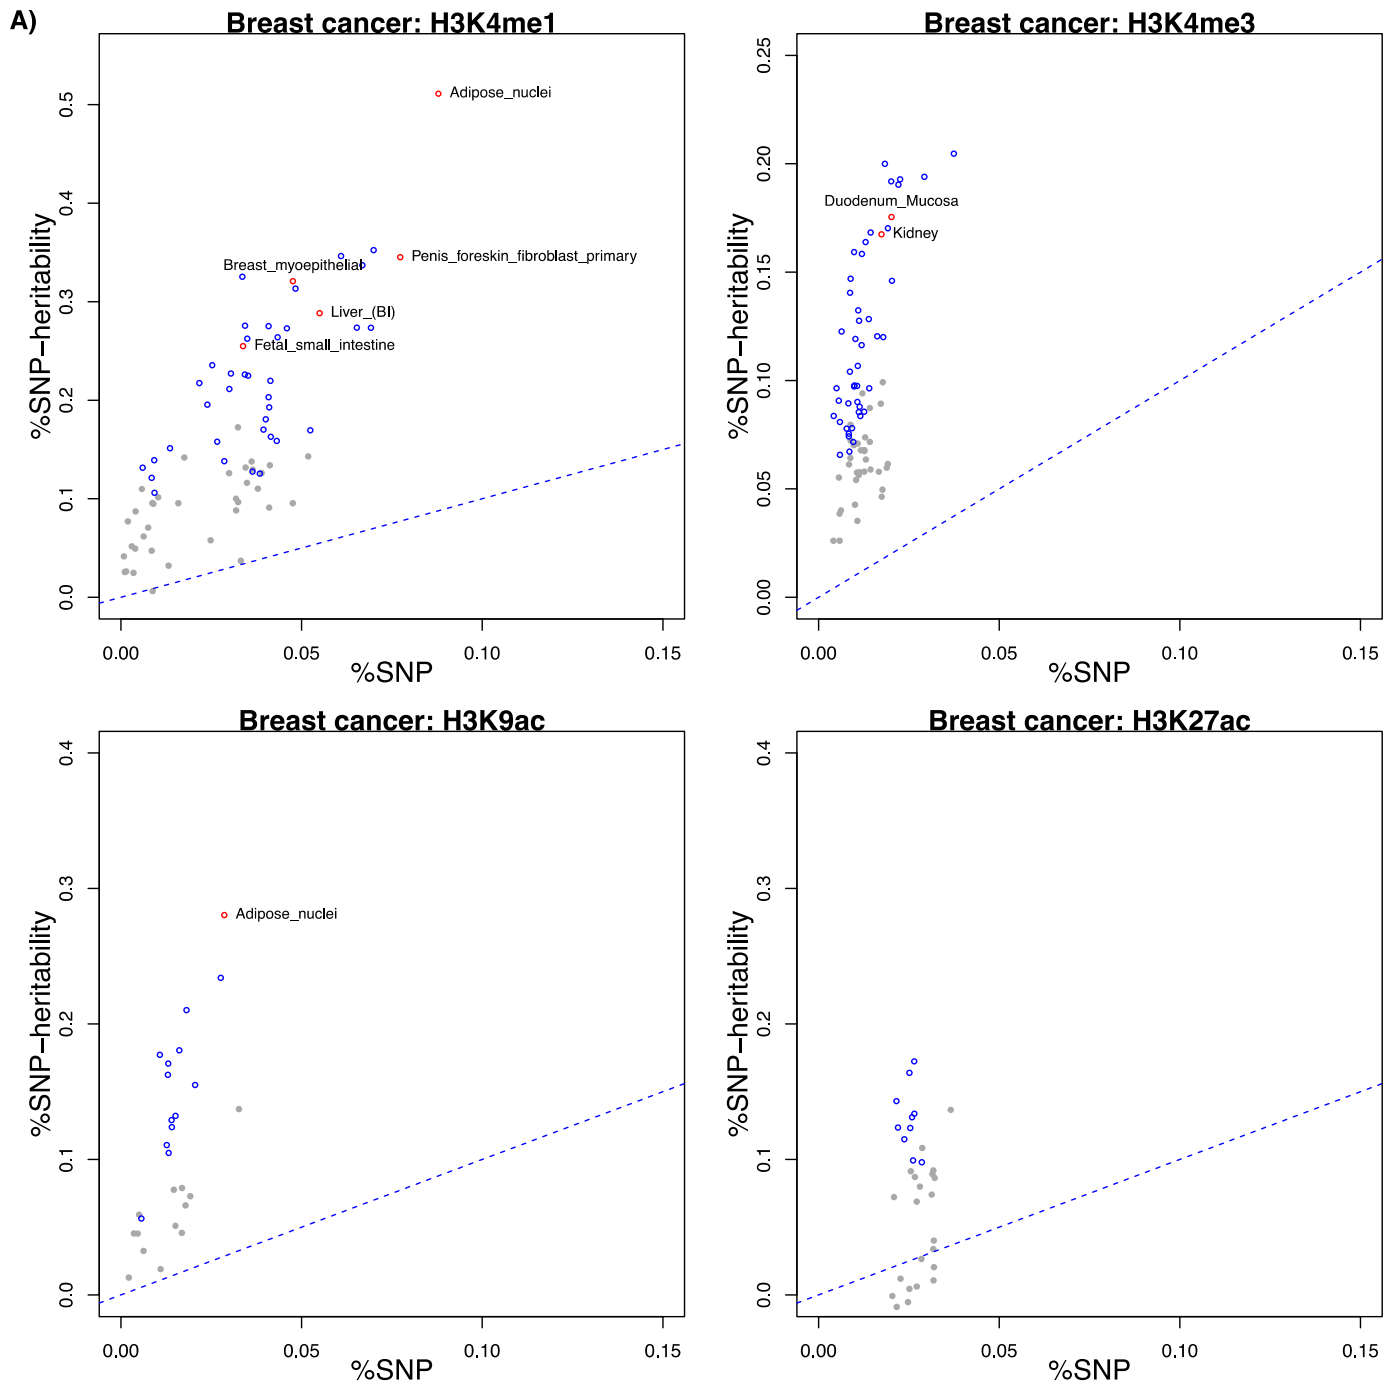

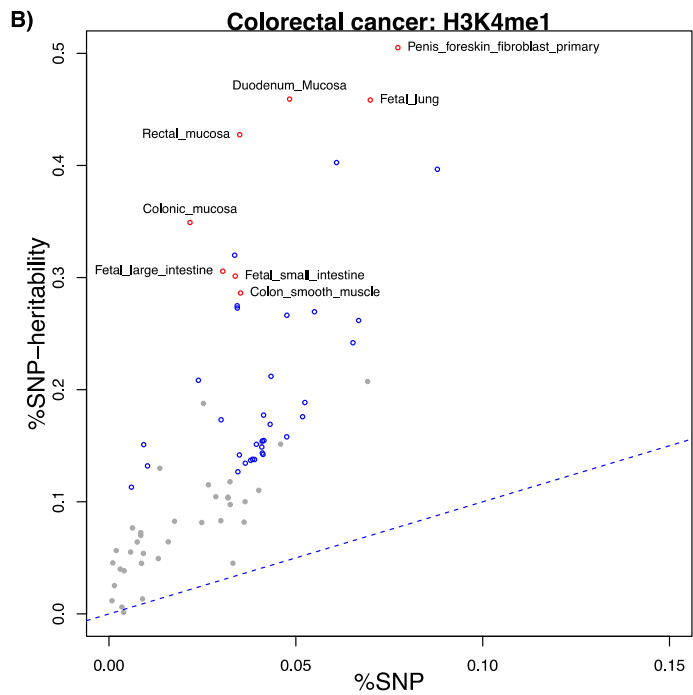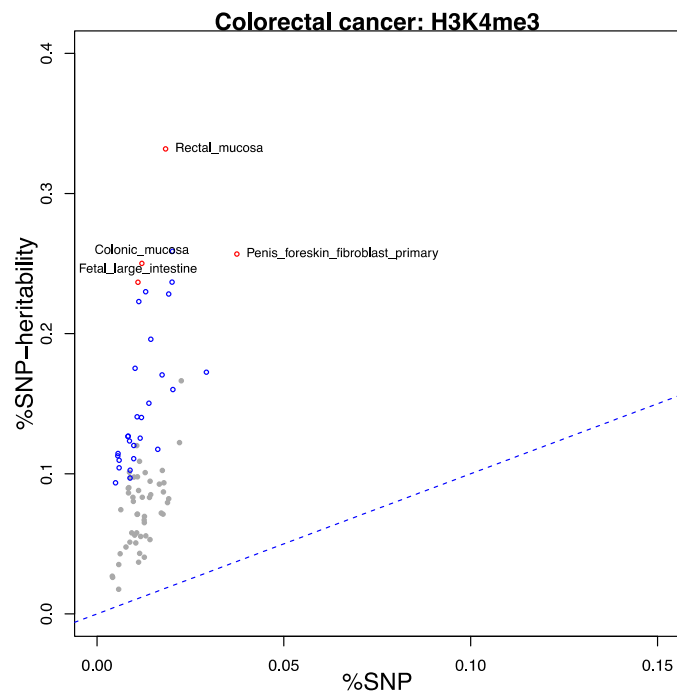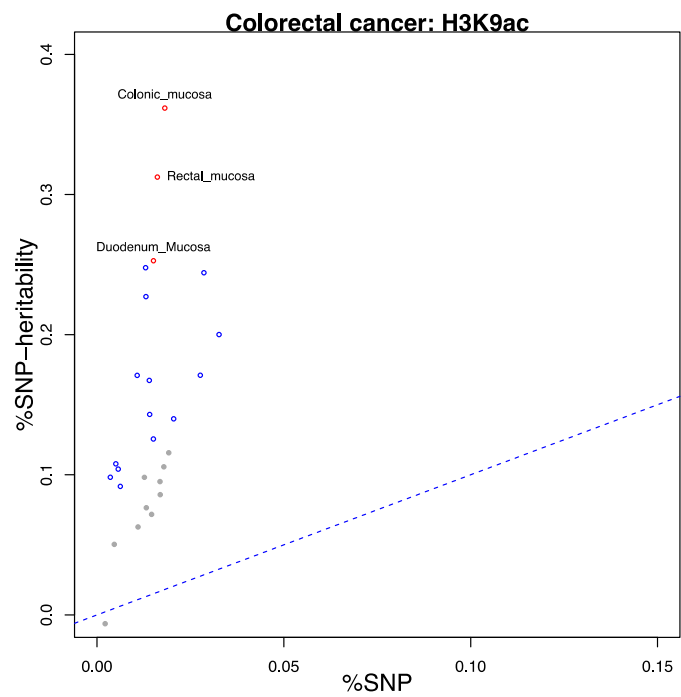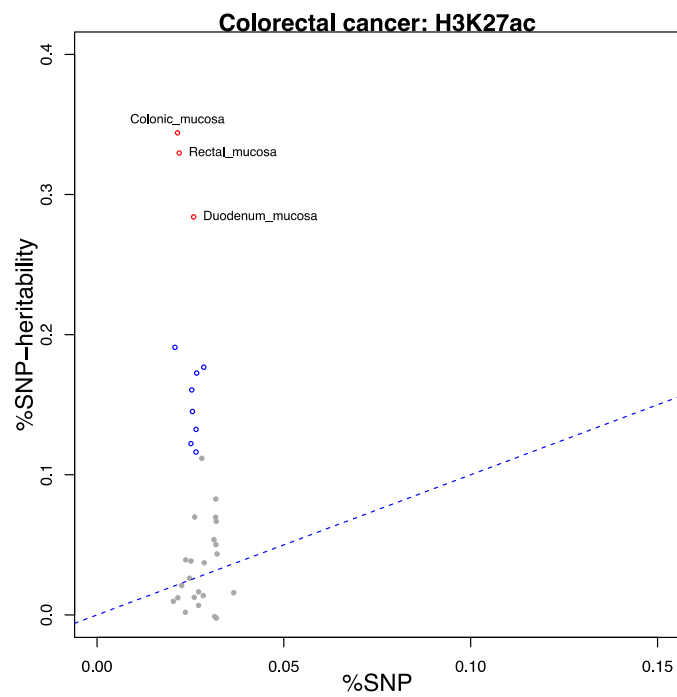

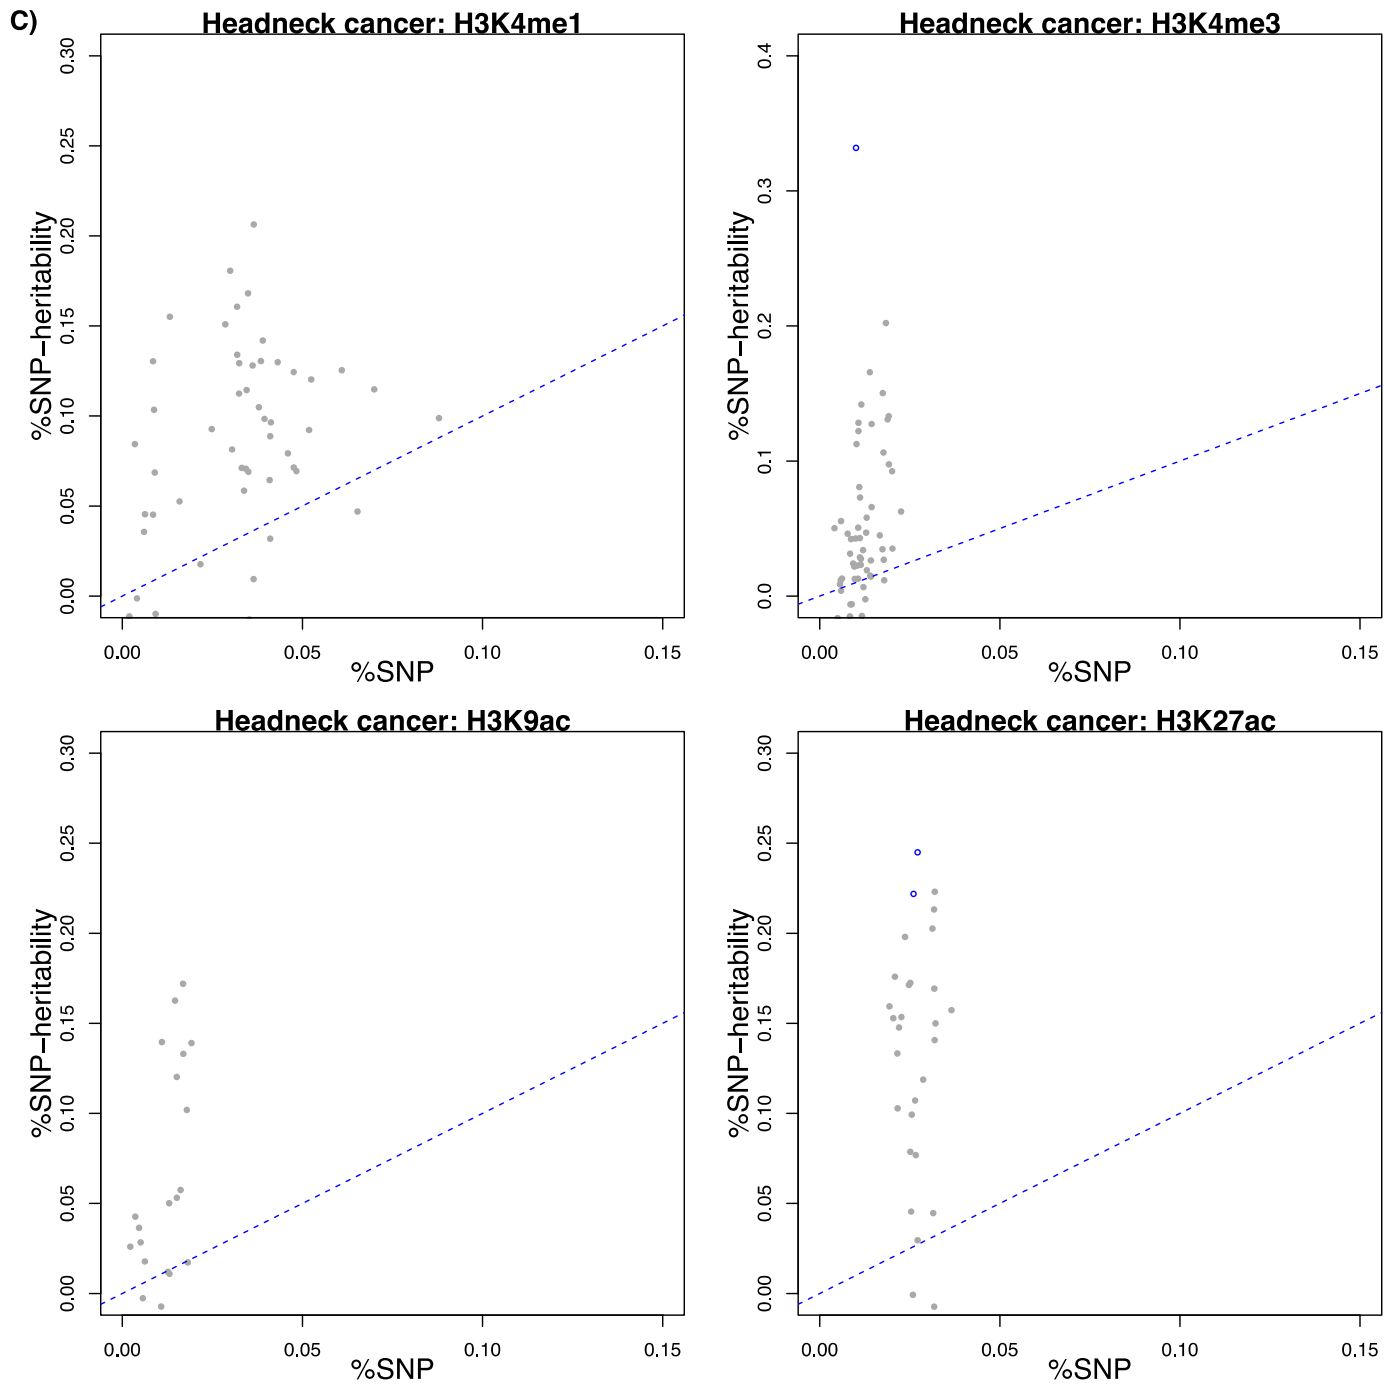

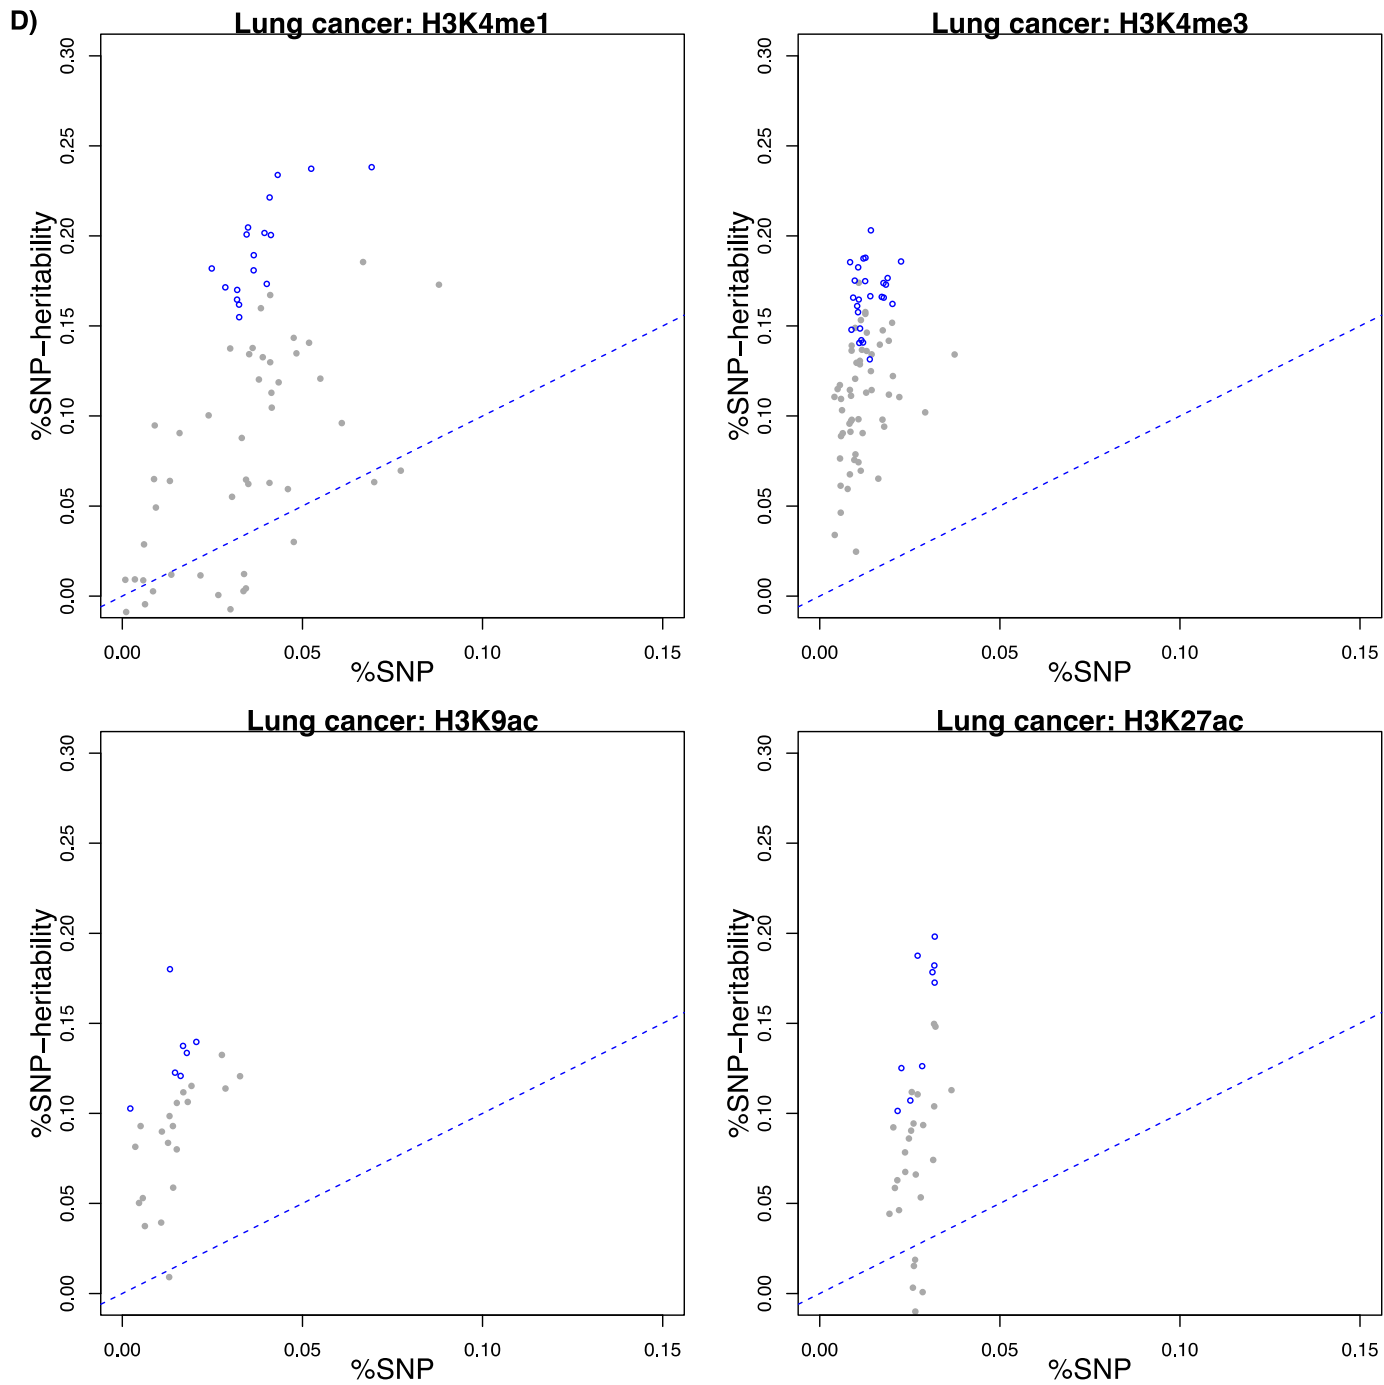

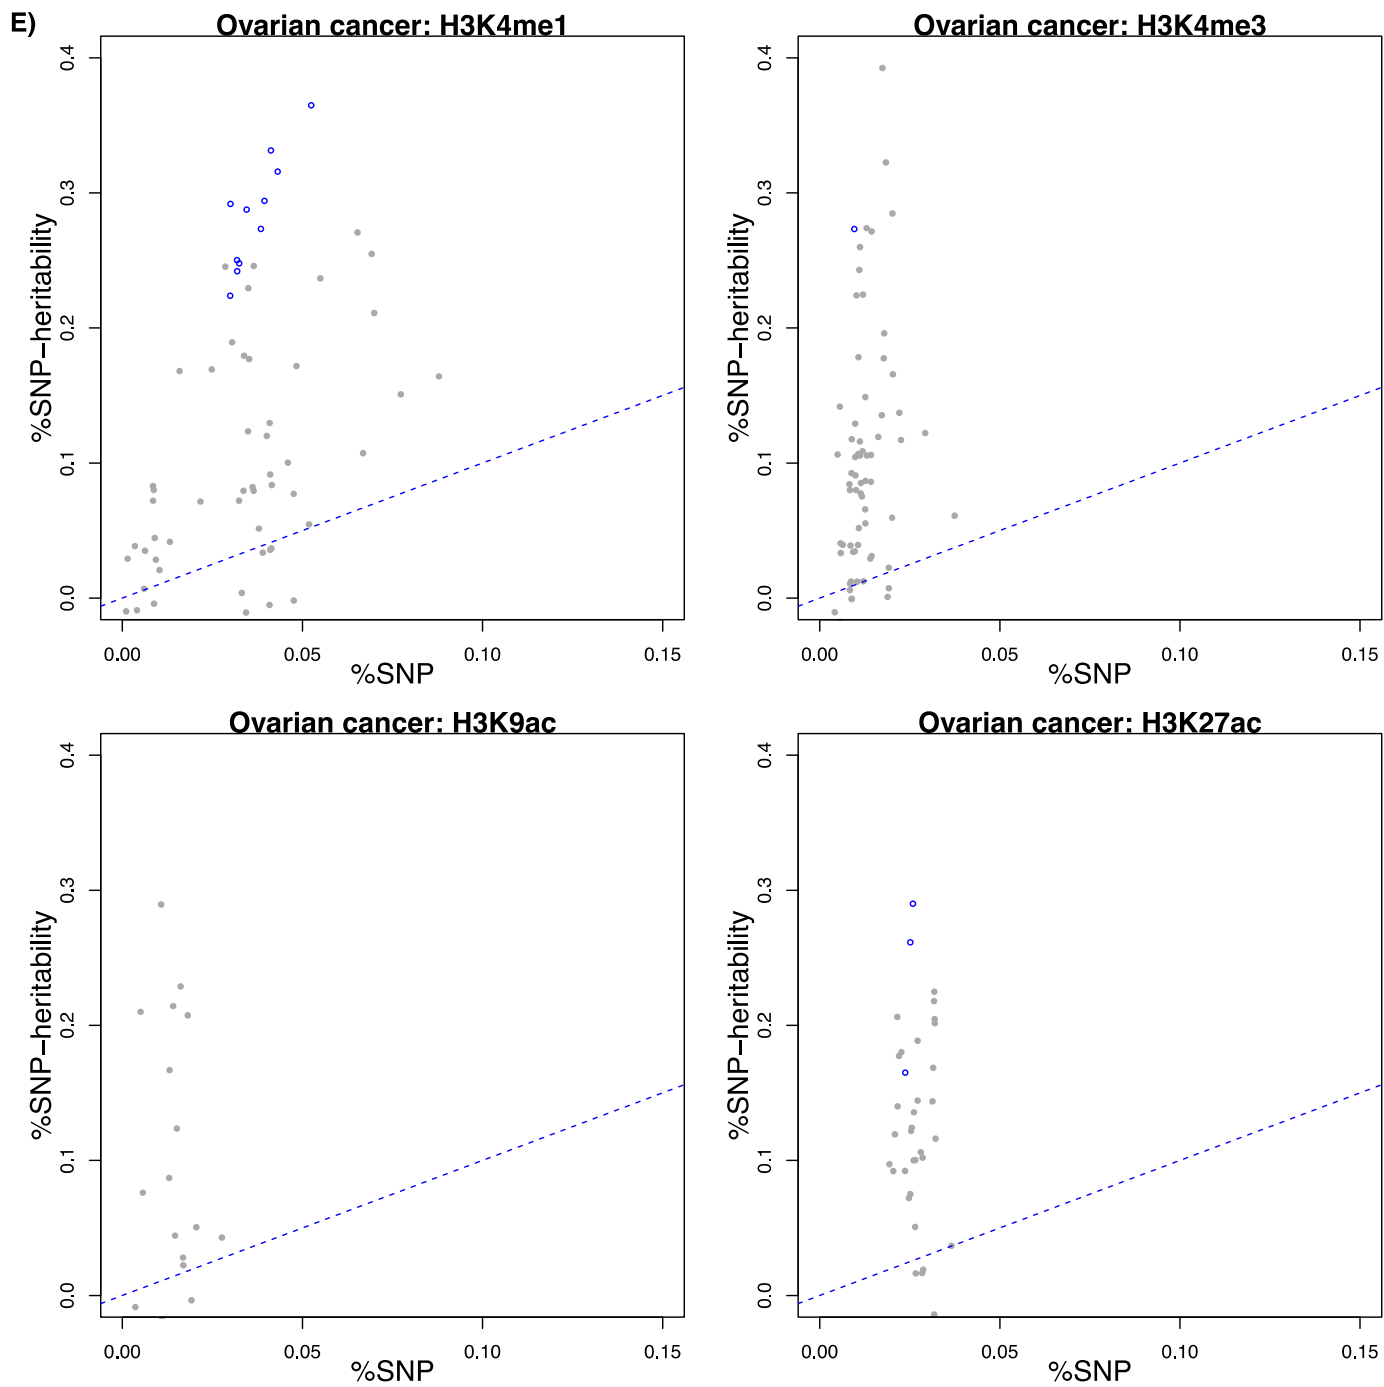



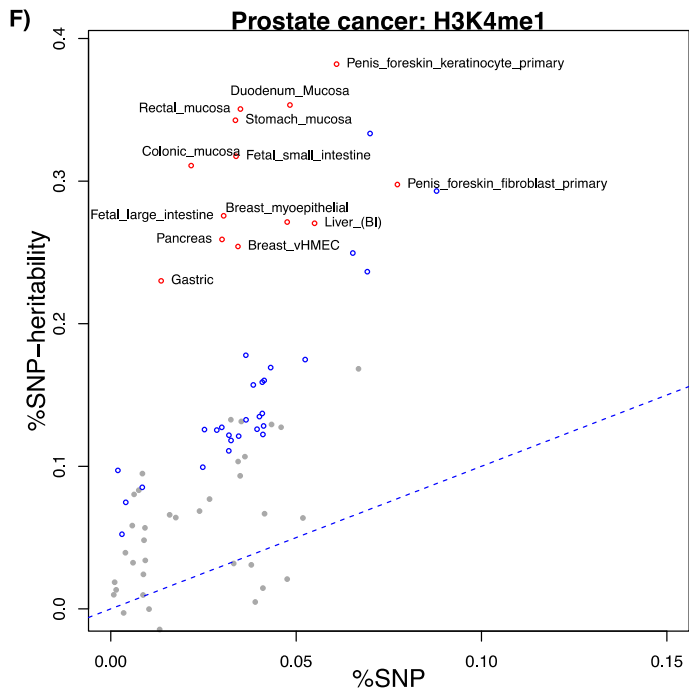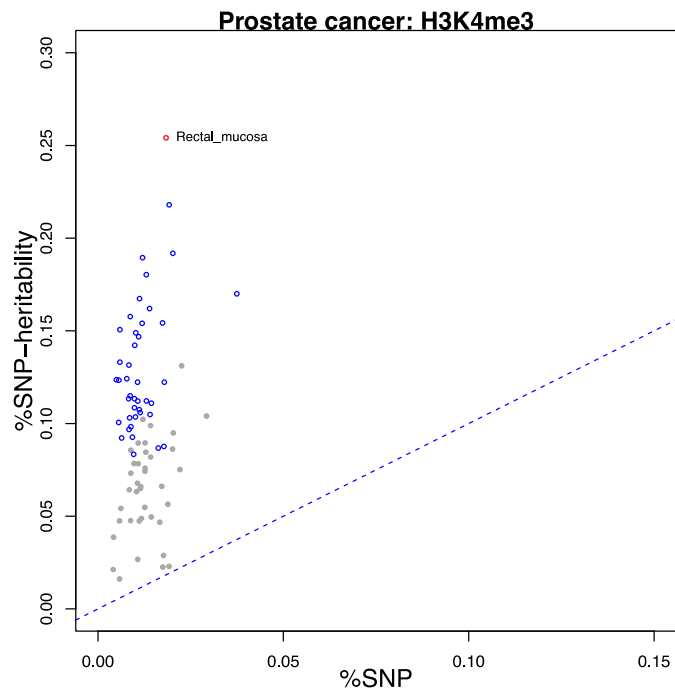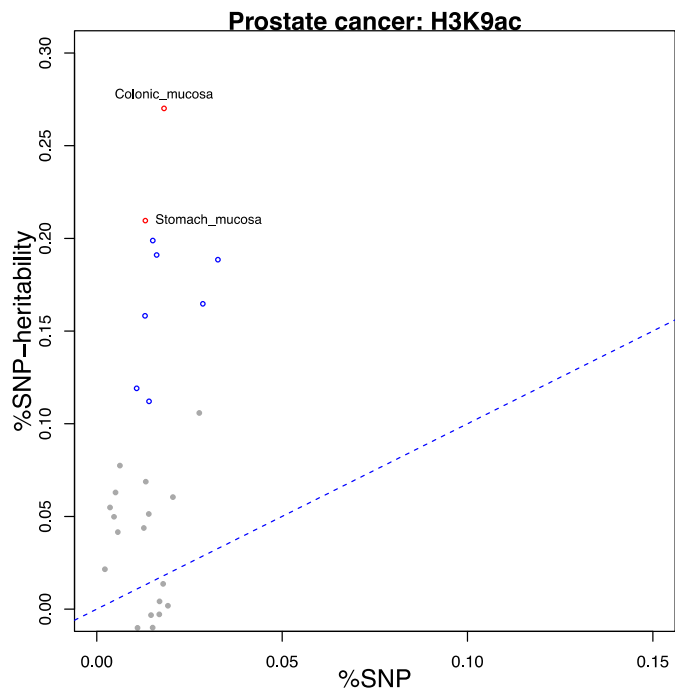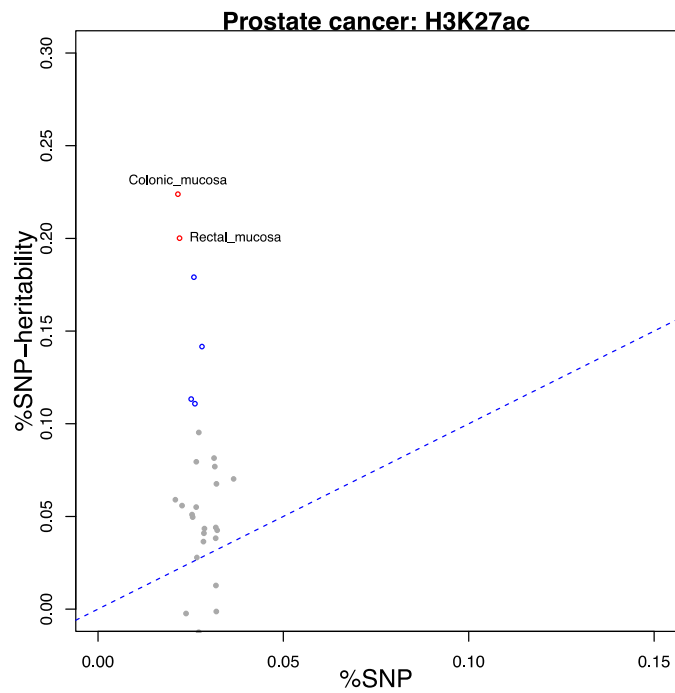

**Supplementary Figure 3. Cell-type-specific functional enrichment in six cancers by histone marks.**

Enrichment of 220 cell-type-specific annotations in six major cancer types, plotted by histone marks (H3K4me1, H3K4me3, H3K9ac, H3K27ac). For each annotation, x-axis measures the proportion of SNPs accounted to that annotation, y-axis measures the proportion of heritability explained by that annotation. Annotations with statistical significance after Bonferroni corrections ( $p < 0.05/220$ ) are marked in red. Annotations with nominal significance ( $p < 0.05$ ) are marked in blue, the remaining annotations are marked in grey. **A)** breast cancer, **B)** colorectal cancer, **C)** head/neck cancer, **D)** lung cancer, **E)** ovarian cancer, and **F)** prostate cancer.

### A) H3K27ac

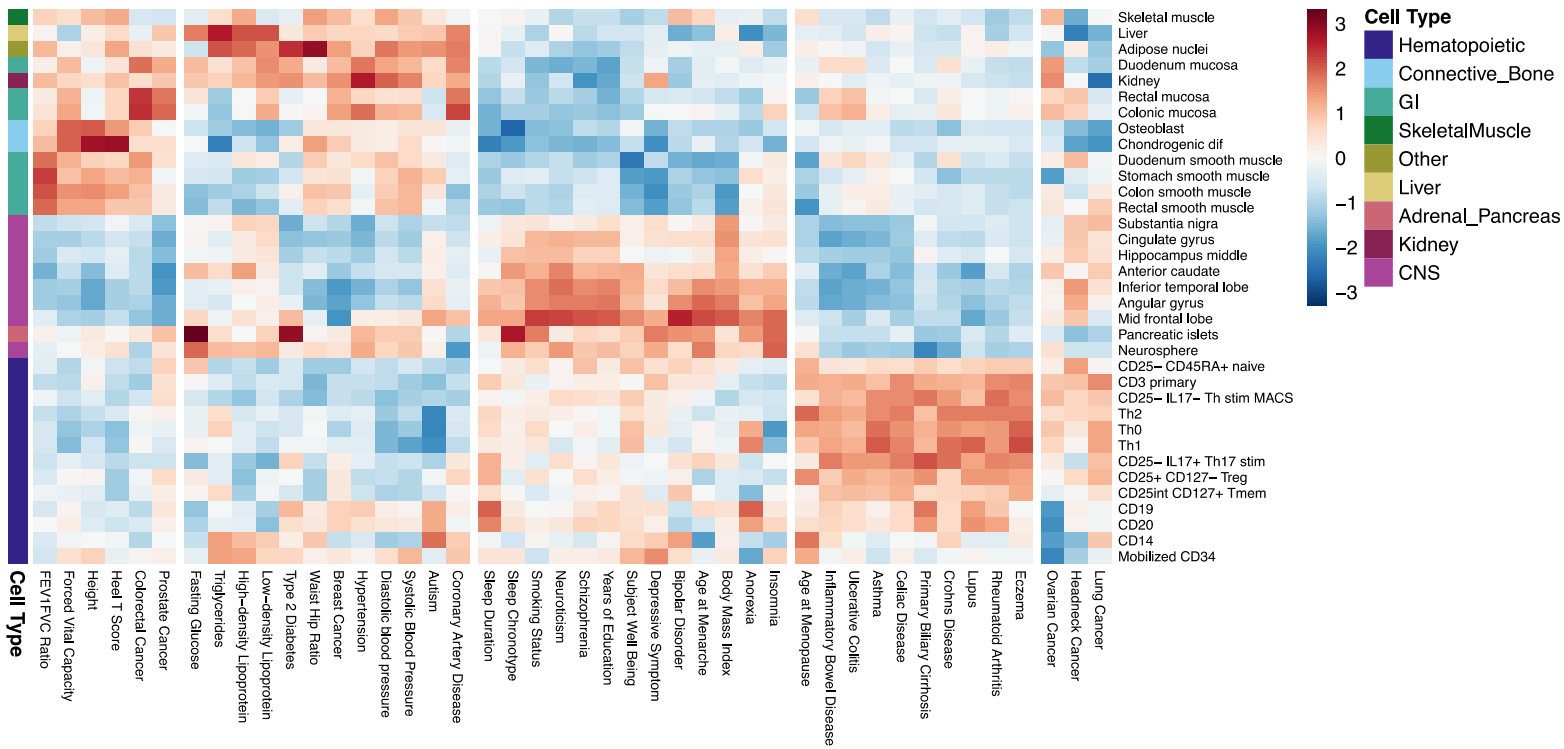

### B) H3K4me1

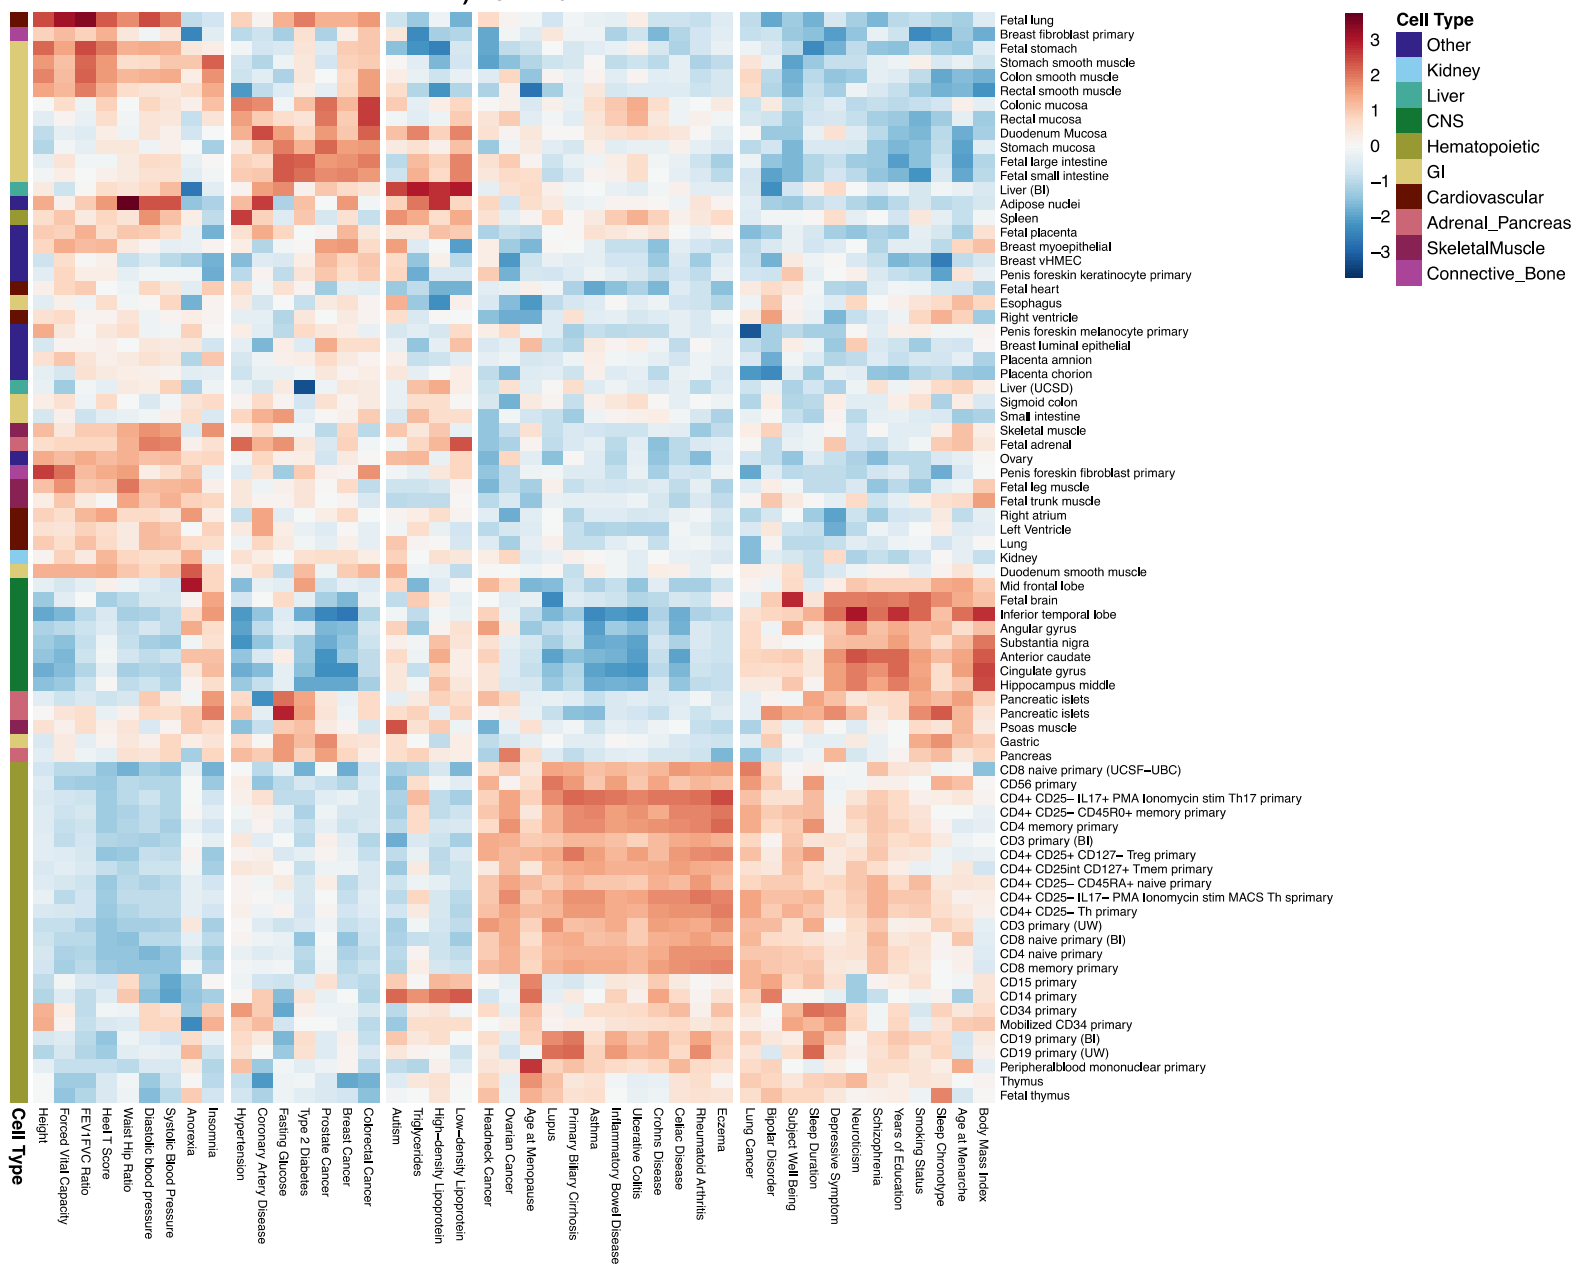

C) H3K4me3

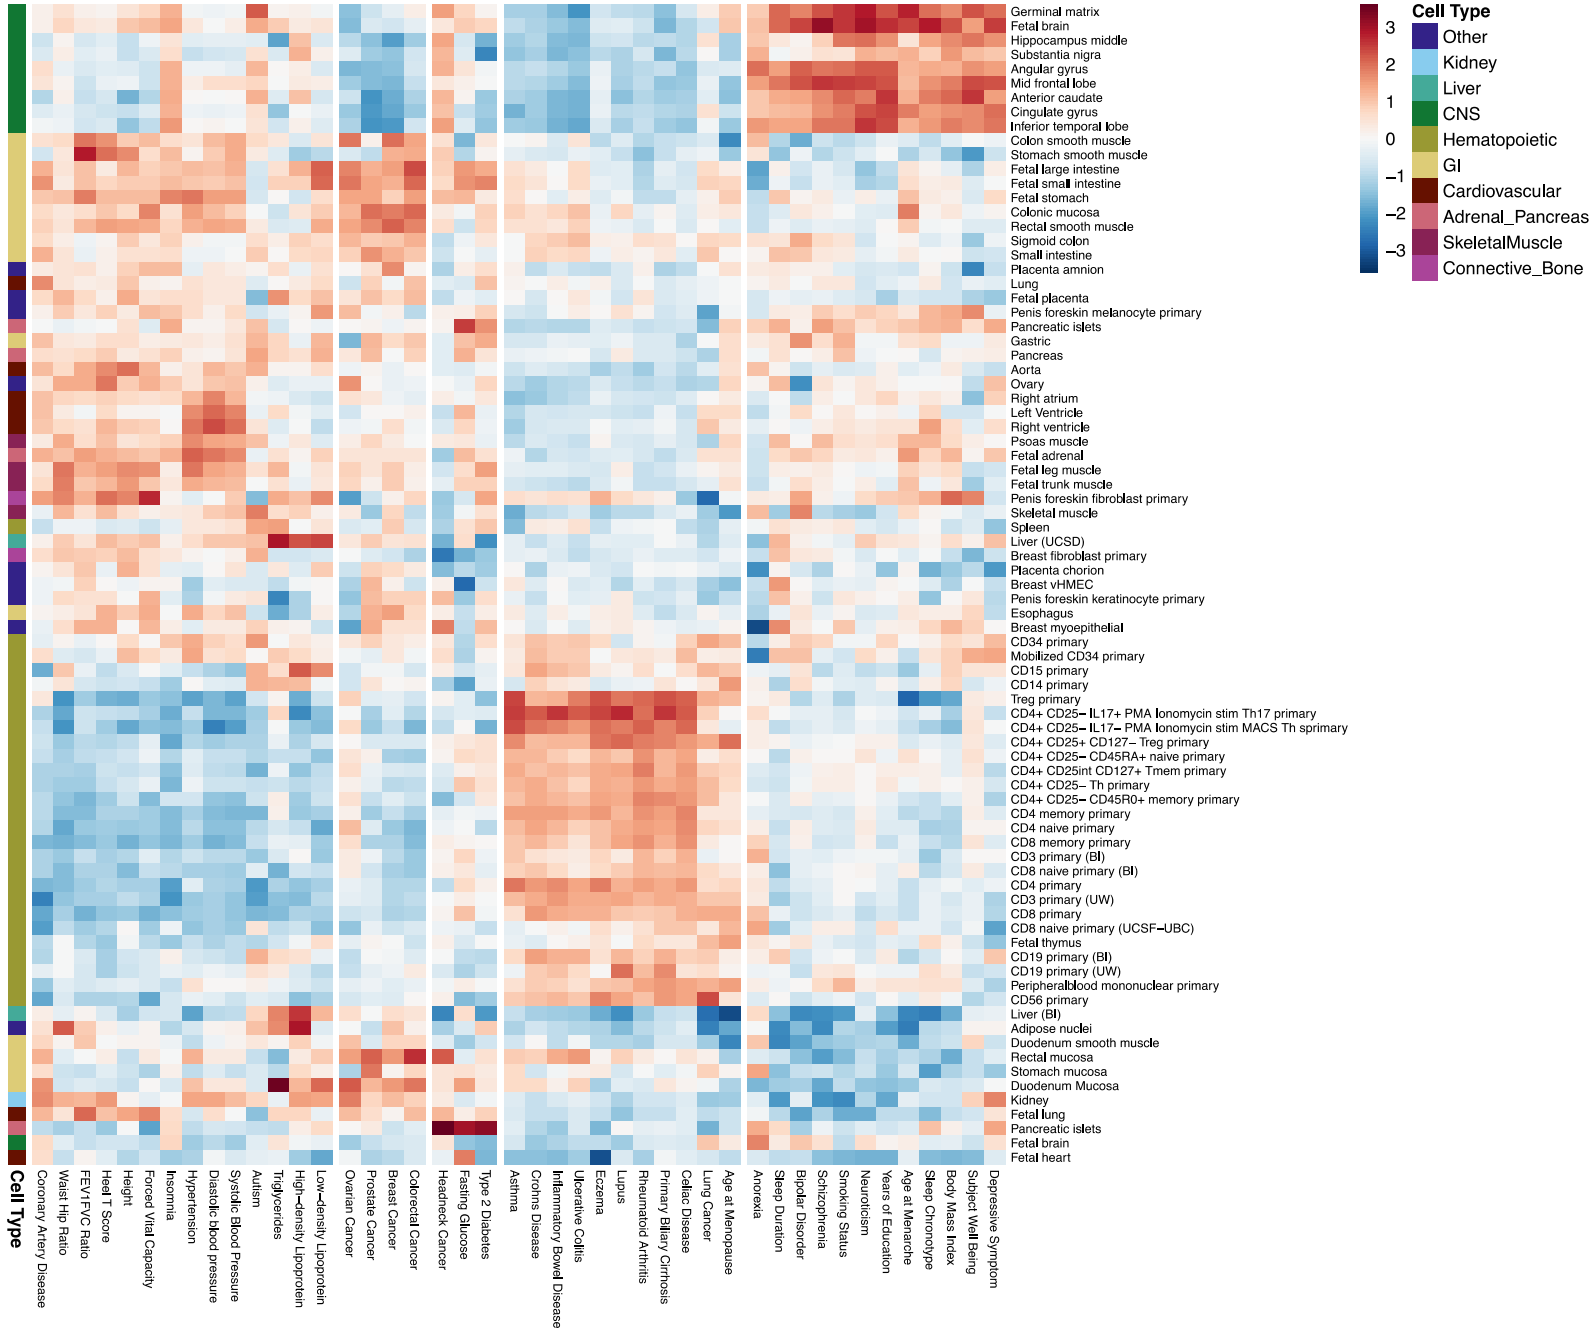

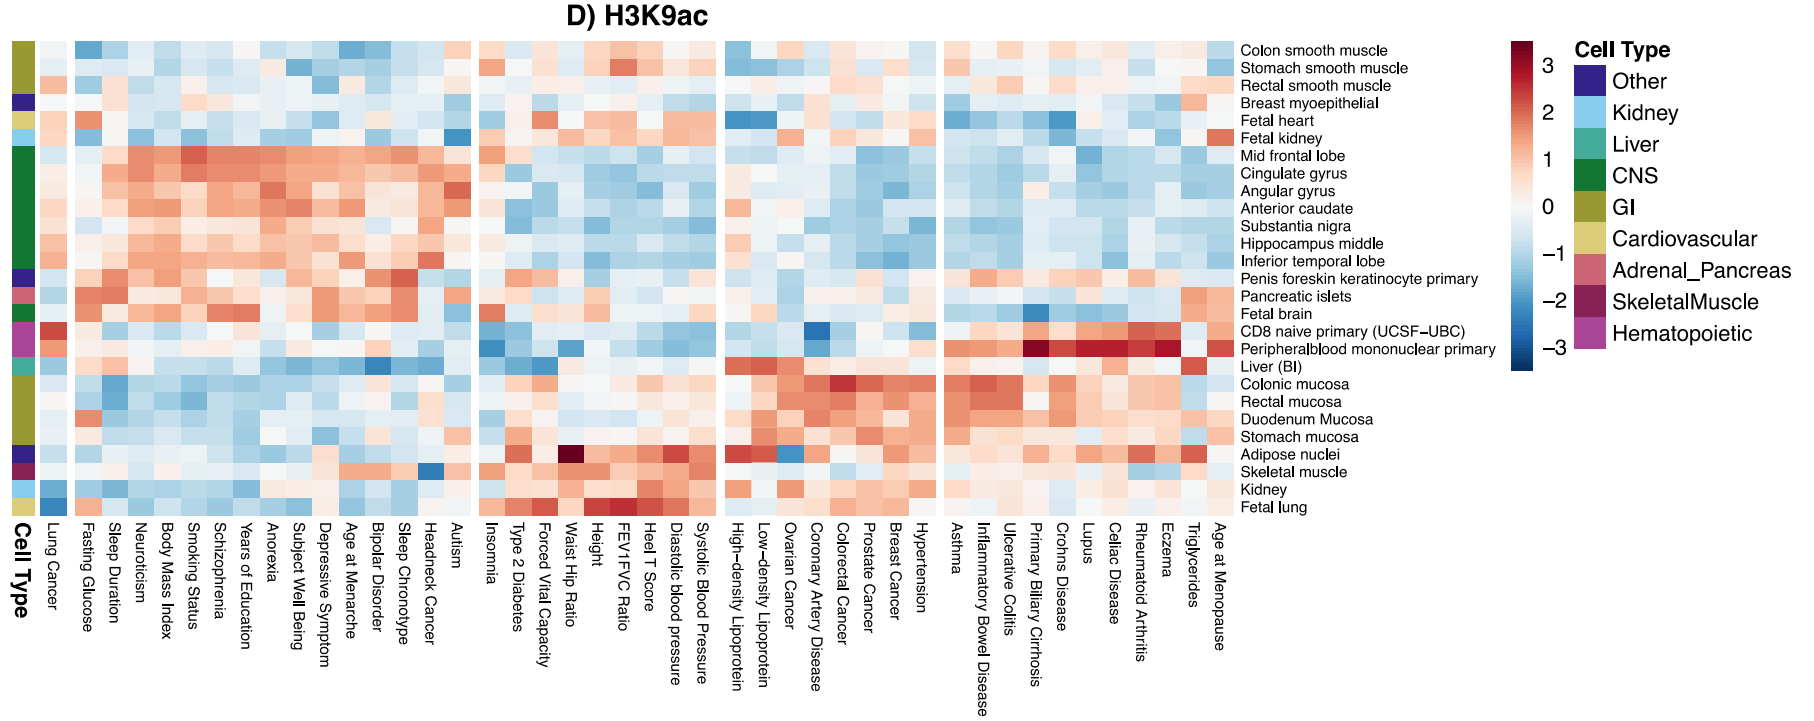

**Supplementary Figure 4. Heat-maps showing bi-clustering of traits and cell-types.**

We performed 220 cell-type-specific annotation analysis in each of the 38 traits; and compared these enrichment results to the enrichment results of six cancers. Each checker reflects the beta coefficient z-score, scaled by traits. Red indicates enrichment, blue indicates depletion. Deeper color represents stronger magnitude of effects. The category of cell types is color coded to the left. **A)** H3K27ac, **B)** H3K4me1, **C)** H3K4me3 and **D)** H3K9ac. GI: gastrointestinal cell types; CNS: central nervous system cell types.
